# Supplementary material for: Trends in student perceptions of school connectedness from 2001 to 2024: Context before and immediately after the implementation of the Whole School Approach to emotional and mental wellbeing in Wales
Source: Research Square preprint supplement (doi:10.21203/rs.3.rs-8659762/v1), 2026-01-30
Supplement: Supplementary file 1 [file 44764feef98131610f7886e8.docx]

**Appendix 1: Survey items across the primary and secondary school surveys**

|  | **Primary school surveys** | **Secondary school surveys** |
| --- | --- | --- |
| Liking school | How do you feel about school?  Answer options: I like it a lot; I like it a bit; I don’t like it very much; and I don’t like it at all. | ‘How do you feel about school at present?’ Answer options: I like it a lot; I like it a bit; I don’t like it very much; and I don’t like it at all. |
| Student decision-making | Thinking about children in your school, how much do you agree or disagree with the following sentences…?   - Children's ideas are treated seriously; - Children have a say in planning school activities; - Children have a chance to help plan school projects?   Answer options: Strongly disagree to strongly agree. | Here are some statements about the pupils in your school. Please show how much you agree or disagree with each one.   - At our school, pupils’ ideas are treated seriously; - At our school, pupils have a say in planning and organising school activities and school events (project weeks or days, sport weeks or days, excursions, field trips etc.); - At our school, pupils have a lot of chances to help decide and plan school projects   Answer options: Strongly disagree to strongly agree. |
| School belonging | Thinking about children in your school, how much do you agree or disagree with the following sentences…?   - I feel like I belong at this school.   Answer options: Strongly disagree to strongly agree. | Here are some statements about the pupils in your school. Please show how much you agree or disagree with each one:   - I feel like I belong at this school.   Answer options: Strongly disagree to strongly agree. |
| Student relationships | Thinking about the children in your class, how much do you agree and disagree with following sentences…?   - Children enjoy being together; - Most children are kind and helpful; - Other children accept me as I am.   Answer options: Strongly disagree to strongly agree. | Here are some statements about the pupils in your class(es). Please show how much you agree or disagree with each one.   - The pupils in my class(es) enjoy being together; - Most of the pupils in my class(es) are kind and helpful; - Other pupils accept me as I am   Answer options: Strongly disagree to strongly agree. |
| Student-staff relationships | Thinking about adults in your school, how much do you agree or disagree with the following sentences…?   - My teachers accept me as I am; - My teachers care about me as a person; - I trust my teachers | Here are some statements about your teachers. Please show how much you agree or disagree with each one.   - I feel that my teachers accept me as I am; - I feel that my teachers care about me as a person; - I feel a lot of trust in my teachers.   Answer options: Strongly disagree to strongly agree. |
| Adult to confide in | Thinking about adults in your school, how much do you agree or disagree with the following sentence…?   - There is at least one adult at this school I can talk to about things that worry me.   Answer options: Strongly disagree to strongly agree. | Here are some statements about your teachers. Please show how much you agree or disagree with each one.   - There is at least one teacher or other member of staff at this school who I can talk to about things that worry me   Answer options: Strongly disagree to strongly agree. |

**Appendix 2: Survey years with available data for each outcome and year used as reference for analyses**

|  | **Primary school data** | | **Secondary school data** | |
| --- | --- | --- | --- | --- |
|  | *Survey years* | *Reference year* | *Survey years* | *Reference year* |
|  |  |  |  |  |
| **Staff-student relationships** | 2019, 2021, 2023, 2024 | 2019 | 2013, 2017, 2019, 2021, 2023 | 2013 |
| **Student relationships** | 2019, 2021, 2023, 2024 | 2019 | 2001, 2003, 2005, 2009, 2013, 2017, 2019, 2021, 2023 | 2009 |
| **Student decision-making** | 2019, 2021, 2023, 2024 | 2019 | 2013, 2017, 2019, 2021, 2023 | 2013 |
| **Liking school** | 2019, 2021, 2023, 2024 | 2019 | 2001, 2003, 2005, 2009, 2013, 2017, 2019, 2021, 2023 | 2009 |
| **School belonging** | 2019, 2021, 2023, 2024 | 2019 | 2001, 2003, 2017, 2019, 2021, 2023 | 2017 |
| **Adult to confide in** | 2019, 2021, 2023, 2024 | 2019 | 2017, 2019, 2021, 2023 | 2017 |

**Appendix 3: Weighted sample statistics for primary school data (provides comparison with Table 1)**

| Sample characteristics of 10-11 year olds participating in the Welsh school surveys in our study between 2019 and 2024  **ESTIMATES WEIGHTED BY LOCAL AUTHORITY** | | | | |
| --- | --- | --- | --- | --- |
|  | **2019** | **2021** | **2023** | **2024** |
| **Gender** |  |  |  |  |
| Boy | 50.9% | 47.7% | 48.7% | 49.6% |
| Girl | 48.4% | 50.1% | 49.0% | 49.1% |
| Missing (.) | 0.7% | 0.2% | 0.2% | 0.1% |
| **Family affluence** | | | | |
| Low | 34.5% | 26.4% | 48.4% | 29.8% |
| Medium | 39.1% | 38.7% | 18.6% | 36.2% |
| High | 24.4% | 28.3% | 23.9% | 25.1% |
| Missing (.) | 2.0% | 6.7% | 9.1% | 8.9% |
