# Supplementary material for: Trends in student perceptions of school connectedness from 2001 to 2024: Context before and immediately after the implementation of the Whole School Approach to emotional and mental wellbeing in Wales
Source: Research Square preprint supplement (doi:10.21203/rs.3.rs-8659762/v1), 2026-01-30
Supplement: Supplementary file 2 [file 5ed0c784bb70460b491e3f78.docx]

**APPENDIX 4: PRIMARY SCHOOL WEIGHTED AND UNWEIGHTED ANALYSES**

For each outcome:

1. Unweighted regression estimates for all models

2. Trends graphs based on average values by survey year

3. Weighed regression estimates (weighted by local authority) for all models [sensitivity analyses]

For outcomes with significant interaction effects:

4. Lincom parameter estimates/significance tests (unweighted and weighted by local authority – latter for sensitivity analyses) and margins plots

**STAFF-STUDENT RELATIONSHIPS**

| Staff-student relationships(n=22,506) – **UNWEIGHTED ESTIMATES** using multi-level ordinal logistic regression | | | | | | | | |
| --- | --- | --- | --- | --- | --- | --- | --- | --- |
|  | Model 2  [Adjusted] | | Interaction effects: Model 3  [Gender*Survey year] | | Interaction effects: Model 4  [Family affluence*Survey year] | | Interaction effects: Model 5  [Gender*Survey year + Family affluence*Survey year] | |
|  | OR, 95% CI | P value | OR, 95%CI | P value | OR, 95%CI | P value | OR, 95%CI | P value |
| 2021 | 0.98 (0.85, 1.13) | 0.759 | 1.11 (0.92, 1.34) | 0.261 | 0.98 (0.85, 1.13) | 0.772 | 1.12 (0.93, 1.34) | 0.251 |
| 2023 | 0.78 (0.69, 0.87) | <0.001 | 0.81 (0.70, 0.93) | 0.004 | 0.78 (0.70, 0.87) | <0.001 | 0.81 (0.70, 0.94) | 0.005 |
| 2024 | 0.89 (0.80, 0.99) | 0.034 | 0.90 (0.78, 1.03) | 0.129 | 0.89 (0.80, 0.99) | 0.039 | 0.90 (0.78, 1.04) | 0.145 |
| Girl | 1.19 (1.14, 1.25) | <0.001 | 1.26 (1.07, 1.49) | 0.006 | 1.19 (1.14, 1.25) | <0.001 | 1.26 (1.07, 1.49) | 0.006 |
| FAS | 0.98 (0.95, 1.00) | 0.098 | 0.98 (0.95, 1.00) | 0.096 | 0.91 (0.83, 0.99) | 0.028 | 0.91 (0.83, 0.99) | 0.027 |
| Girl*2021 | - | - | 0.78 (0.61, 0.99) | 0.042 | - | - | 0.77 (0.61, 0.99) | 0.041 |
| Girl*2023 | - | - | 0.93 (0.77, 1.11) | 0.414 | - | - | 0.92 (0.77, 1.11) | 0.400 |
| Girl*2024 | - | - | 0.98 (0.82, 1.17) | 0.818 | - | - | 0.98 (0.82, 1.17) | 0.794 |
| FAS*2021 | - | - | - | - | 1.11 (0.97, 1.26) | 0.127 | 1.10 (0.97, 1.26) | 0.142 |
| FAS*2023 | - | - | - | - | 1.06 (0.96, 1.17) | 0.229 | 1.06 (0.96, 1.17) | 0.218 |
| FAS*2024 | - | - | - | - | 1.10 (1.00, 1.20) | 0.047 | 1.10 (1.00, 1.21) | 0.045 |
| Girl*FAS | - | - | - | - | - | - | - | - |
| Lrtest compared to: | Model 1: Chi2 = 54.01; p<0.001 | | Model 2: Chi2 = 6.39; p=0.0941 | | Model 2: Chi2 = 4.92; p=0.1780 | | Model 2: Chi2 = 11.28; p=0.0801  Model 3: Chi2 = 4.89; p=0.1801  Model 4: Chi2 = 6.36; p=0.0952 | |

| Staff-student relationships (n=22,506) – **ESTIMATES WEIGHTED BY LOCAL AUTHORITY** using multi-level ordinal logistic regression | | | | | | | | | | |
| --- | --- | --- | --- | --- | --- | --- | --- | --- | --- | --- |
|  | Model 1  [Main effect of cohort] | | Model 2  [Adjusted] | | Interaction effects: Model 3  [Gender*Survey year] | | Interaction effects: Model 4  [Family affluence*Survey year] | | Interaction effects: Model 5  [Gender*Survey year + Family affluence*Survey year] | |
|  | OR, 95% CI | P value | OR, 95% CI | P value | OR, 95%CI | P value | OR, 95%CI | P value | OR, 95%CI | P value |
| 2021 | 0.97 (0.78, 1.21) | 0.813 | 1.01 (0.81, 1.27) | 0.915 | 1.15 (0.89, 1.47) | 0.278 | 1.01 (0.81, 1.26) | 0.921 | 1.15 (0.90, 1.47) | 0.267 |
| 2023 | 0.74 (0.62, 0.88) | 0.001 | 0.77 (0.65, 0.92) | 0.004 | 0.81 (0.66, 0.98) | 0.031 | 0.78 (0.65, 0.92) | 0.004 | 0.81 (0.67, 0.99) | 0.035 |
| 2024 | 0.84 (0.71, 1.00) | 0.045 | 0.87 (0.73, 1.04) | 0.121 | 0.89 (0.73, 1.07) | 0.218 | 0.87 (0.73, 1.04) | 0.128 | 0.89 (0.73, 1.08) | 0.234 |
| Girl | - |  | 1.20 (1.13, 1.27) | <0.001 | 1.28 (1.09, 1.50) | 0.002 | 1.20 (1.13, 1.27) | <0.001 | 1.28 (1.10, 1.51) | 0.002 |
| FAS | - | - | 0.97 (0.95, 1.00) | 0.079 | 0.97 (0.95, 1.00) | 0.074 | 0.91 (0.82, 1.01) | 0.083 | 0.91 (0.82, 1.01) | 0.079 |
| Girl*2021 | - | - | - | - | 0.78 (0.60, 1.02) | 0.065 | - | - | 0.78 (0.60, 1.02) | 0.065 |
| Girl*2023 | - | - | - | - | 0.92 (0.76, 1.11) | 0.367 | - | - | 0.91 (0.76, 1.10) | 0.352 |
| Girl*2024 | - | - | - | - | 0.97 (0.81, 1.15) | 0.708 | - | - | 0.96 (0.81, 1.15) | 0.683 |
| FAS*2021 | - | - | - | - | - | - | 1.10 (0.93, 1.29) | 0.275 | 1.09 (0.93, 1.28) | 0.309 |
| FAS*2023 | - | - | - | - | - | - | 1.05 (0.95, 1.18) | 0.343 | 1.06 (0.95, 1.18) | 0.329 |
| FAS*2024 | - | - | - | - | - | - | 1.08 (0.97, 1.21) | 0.172 | 1.08 (0.97, 1.21) | 0.165 |
| Girl*FAS | - | - | - | - | - | - | - | - | - | - |
| Wald test* | - | - | Model 1: Chi2 = 37.62; p<0.001 | | Model 2: Chi2 = 4.46, p=0.2163 | | Model 2: Chi2 = 2.31, p=0.5105 | | Model 2: Chi2 = 6.33, p=0.3878  Model 3: Chi2 = 2.27, p=0.5187  Model 4: Chi2 = 4.40, p=0.2217 | |

*Wald test used as likelihood ratio test not appropriate with robust standard errors (used in weighted regression)

**STUDENT RELATIONSHIPS**

| Student relationships (n=21,933) – **UNWEIGHTED ESTIMATES** using multi-level ordinal logistic regression | | | | | | | | |
| --- | --- | --- | --- | --- | --- | --- | --- | --- |
|  | Model 2  [Adjusted] | | Interaction effects: Model 3  [Gender*Survey year] | | Interaction effects: Model 4  [Family affluence*Survey year] | | Interaction effects: Model 5  [Gender*Survey year + Family affluence*Survey year] | |
|  | OR, 95% CI | P value | OR, 95%CI | P value | OR, 95%CI | P value | OR, 95%CI | P value |
| 2021 | 1.06 (0.93, 1.22) | 0.378 | 1.15 (0.90, 1.47) | 0.278 | 1.06 (0.93, 1.22) | 0.386 | 1.17 (0.98, 1.40) | 0.086 |
| 2023 | 0.69 (0.62, 0.78) | <0.001 | 0.81 (0.66, 0.98) | 0.031 | 0.70 (0.62, 0.78) | <0.001 | 0.75 (0.65, 0.86) | <0.001 |
| 2024 | 0.93 (0.84, 1.04) | 0.192 | 0.89 (0.73, 1.07) | 0.218 | 0.93 (0.84, 1.04) | 0.198 | 0.97 (0.85, 1.11) | 0.660 |
| Girl | 0.86 (0.82, 0.90) | <0.001 | 0.96 (0.82, 1.12) | 0.597 | 0.86 (0.82, 0.90) | <0.001 | 0.96 (0.82, 1.13) | 0.631 |
| FAS | 1.01 (0.99, 1.04) | 0.281 | 1.01 (0.99, 1.04) | 0.284 | 0.95 (0.88, 1.03) | 0.249 | 0.95 (0.87, 1.03) | 0.230 |
| Girl*2021 | - | - | 0.82 (0.64, 1.04) | 0.104 | - | - | 0.82 (0.64, 1.04) | 0.102 |
| Girl*2023 | - | - | 0.86 (0.72, 1.03) | 0.098 | - | - | 0.86 (0.72, 1.03) | 0.094 |
| Girl*2024 | - | - | 0.92 (0.78, 1.10) | 0.364 | - | - | 0.92 (0.77, 1.09) | 0.343 |
| FAS*2021 | - | - | - | - | 1.10 (0.97, 1.25) | 0.142 | 1.10 (0.97, 1.25) | 0.146 |
| FAS*2023 | - | - | - | - | 1.03 (0.94, 1.13) | 0.489 | 1.04 (0.94, 1.14) | 0.454 |
| FAS*2024 | - | - | - | - | 1.09 (1.00, 1.20) | 0.052 | 1.10 (1.00, 1.20) | 0.047 |
| Lrtest compared to: | Model 1: Chi2 = 39.57; p<0.001 | | Model 2: Chi2 = 4.52; p=0.2107 | | Model 2: Chi2 = 6.95; p=0.0734 | | Model 2: Chi2 = 11.45; p=0.0754  Model 3: Chi2 = 6.93; p=0.0741  Model 4: Chi2 = 4.50; p=0.2124 | |

| Student relationships (n=21,933) – **ESTIMATES WEIGHTED BY LOCAL AUTHORITY** using multi-level ordinal logistic regression | | | | | | | | | | |
| --- | --- | --- | --- | --- | --- | --- | --- | --- | --- | --- |
|  | Model 1  [Main effect of cohort] | | Model 2  [Adjusted] | | Interaction effects: Model 3  [Gender*Survey year] | | Interaction effects: Model 4  [Family affluence*Survey year] | | Interaction effects: Model 5  [Gender*Survey year + Family affluence*Survey year] | |
|  | OR, 95% CI | P value | OR, 95% CI | P value | OR, 95%CI | P value | OR, 95%CI | P value | OR, 95%CI | P value |
| 2021 | 1.14 (0.92, 1.42) | 0.226 | 1.17 (0.94, 1.46) | 0.161 | 1.29 (0.99, 1.69) | 0.064 | 1.17 (0.93, 1.45) | 0.176 | 1.28 (0.98, 1.68) | 0.068 |
| 2023 | 0.72 (0.61, 0.85) | <0.001 | 0.73 (0.62, 0.86) | <0.001 | 0.80 (0.66, 0.97) | 0.024 | 0.74 (0.62, 0.87) | <0.001 | 0.81 (0.66, 0.98) | 0.027 |
| 2024 | 0.95 (0.80, 1.11) | 0.505 | 0.96 (0.81, 1.13) | 0.612 | 1.01 (0.83, 1.22) | 0.918 | 0.96 (0.81, 1.13) | 0.613 | 1.01 (0.84, 1.23) | 0.905 |
| Girl | - | - | 0.86 (0.82, 0.92) | <0.001 | 0.99 (0.85, 1.15) | 0.892 | 0.87 (0.82, 0.92) | <0.001 | 0.99 (0.86, 1.15) | 0.927 |
| FAS | - | - | 1.01 (0.98, 1.03) | 0.673 | 1.01 (0.98, 1.03) | 0.687 | 0.96 (0.89, 1.04) | 0.330 | 0.96 (0.89, 1.04) | 0.294 |
| Girl*2021 | - | - | - | - | 0.82 (0.60, 1.11) | 0.192 | - | - | 0.82 (0.61, 1.01) | 0.193 |
| Girl*2023 | - | - | - | - | 0.83 (0.70, 0.99) | 0.037 | - | - | 0.83 (0.70, 0.99) | 0.035 |
| Girl*2024 | - | - | - | - | 0.89 (0.76, 1.06) | 0.193 | - | - | 0.89 (0.75, 1.05) | 0.182 |
| FAS*2021 | - | - | - | - | - | - | 1.08 (0.94, 1.24) | 0.255 | 1.08 (0.95, 1.24) | 0.250 |
| FAS*2023 | - | - | - | - | - | - | 1.01 (0.92, 1.10) | 0.909 | 1.01 (0.92, 1.10) | 0.849 |
| FAS*2024 | - | - | - | - | - | - | 1.07 (0.98, 1.17) | 0.115 | 1.08 (0.99, 1.17) | 0.100 |
| Wald test compared to: | - | - | Model 1: Chi2 = 24.17; p<0.001 | | Model 2: Chi2 = 4.71; p=0.1942 | | Model 2: Chi2 = 5.98; p=0.1128 | | Model 2: Chi2 = 11.09; p=0.0857  Model 3: Chi2 = 5.98; p=0.1124  Model 4: Chi2 = 4.75; p=0.1907 | |

**STUDENT DECISION-MAKING**

| Student decision-making (n=21,756) **– UNWEIGHTED ESTIMATES** using multi-level ordinal logistic regression | | | | | | | | |
| --- | --- | --- | --- | --- | --- | --- | --- | --- |
|  | Model 2  [Adjusted] | | Interaction effects: Model 3  [Gender*Survey year] | | Interaction effects: Model 4  [Family affluence*Survey year] | | Interaction effects: Model 5  [Gender*Survey year + Family affluence*Survey year] | |
|  | OR, 95% CI | P value | OR, 95%CI | P value | OR, 95%CI | P value | OR, 95%CI | P value |
| 2021 | 1.04 (0.90, 1.20) | 0.566 | 1.00 (0.83, 1.21) | 0.975 | 1.04 (0.90, 1.20) | 0.601 | 1.00 (0.83, 1.20) | 0.976 |
| 2023 | 1.04 (0.93, 1.17) | 0.496 | 0.93 (0.81, 1.08) | 0.369 | 1.04 (0.93, 1.17) | 0.478 | 0.94 (0.81, 1.08) | 0.375 |
| 2024 | 1.05 (0.94, 1.17) | 0.415 | 0.96 (0.83, 1.11) | 0.596 | 1.05 (0.94, 1.17) | 0.411 | 0.96 (0.83, 1.11) | 0.597 |
| Girl | 1.16 (1.10, 1.21) | <0.001 | 0.98 (0.83, 1.15) | 0.780 | 1.16 (1.10, 1.21) | <0.001 | 0.98 (0.83, 1.15) | 0.778 |
| FAS | 0.97 (0.94, 0.99) | 0.013 | 0.97 (0.94, 0.99) | 0.013 | 0.97 (0.89, 1.05) | 0.443 | 0.97 (0.89, 1.05) | 0.463 |
| Girl*2021 | - | - | 1.09 (0.85, 1.38) | 0.501 | - | - | 1.09 (0.86, 1.39) | 0.478 |
| Girl*2023 | - | - | 1.24 (1.04, 1.49) | 0.018 | - | - | 1.24 (1.04, 1.49) | 0.018 |
| Girl*2024 | - | - | 1.19 (1.00, 1.42) | 0.051 | - | - | 1.19 (1.00, 1.42) | 0.051 |
| FAS*2021 | - | - | - | - | 1.05 (0.93, 1.20) | 0.413 | 1.05 (0.93, 1.19) | 0.441 |
| FAS*2023 | - | - | - | - | 0.98 (0.89, 1.07) | 0.604 | 0.97 (0.89, 1.07) | 0.574 |
| FAS*2024 | - | - | - | - | 1.01 (0.92, 1.11) | 0.817 | 1.01 (0.92, 1.11) | 0.839 |
| Lrtest compared to: | Model 1: Chi2 = 41.95; p<0.001 | | Model 2: Chi2 = 6.51; p=0.0892 | | Model 2: Chi2 = 2.90; p=0.4066 | | Model 2: Chi2 = 9.41; p=0.1516  Model 3: Chi2 = 2.90; p=0.4069  Model 4: Chi2 = 6.51; p=0.0893 | |

| Student decision-making (n=21,756) **– ESTIMATES WEIGHTED BY LOCAL AUTHORITY** using multi-level ordinal logistic regression | | | | | | | | | | |
| --- | --- | --- | --- | --- | --- | --- | --- | --- | --- | --- |
|  | Model 1  [Main effect of cohort] | | Model 2  [Adjusted] | | Interaction effects: Model 3  [Gender*Survey year] | | Interaction effects: Model 4  [Family affluence*Survey year] | | Interaction effects: Model 5  [Gender*Survey year + Family affluence*Survey year] | |
|  | OR, 95% CI | P value | OR, 95% CI | P value | OR, 95%CI | P value | OR, 95%CI | P value | OR, 95%CI | P value |
| 2021 | 1.08 (0.87, 1.33) | 0.479 | 1.09 (0.87, 1.36) | 0.468 | 1.03 (0.81, 1.31) | 0.803 | 1.08 (0.86, 1.35) | 0.504 | 1.02 (0.80, 1.30) | 0.870 |
| 2023 | 1.05 (0.88, 1.24) | 0.598 | 1.05 (0.88, 1.25) | 0.558 | 0.96 (0.79, 1.16) | 0.654 | 1.06 (0.89, 1.26) | 0.537 | 0.96 (0.79, 1.16) | 0.674 |
| 2024 | 1.06 (0.90, 1.26) | 0.483 | 1.07 (0.90, 1.27) | 0.446 | 0.99 (0.82, 1.19) | 0.890 | 1.07 (0.90, 1.28) | 0.436 | 0.99 (0.82, 1.20) | 0.903 |
| Girl | - | - | 1.16 (1.10, 1.22) | <0.001 | 0.99 (0.82, 1.18) | 0.878 | 1.16 (1.10, 1.22) | <0.001 | 0.99 (0.82, 1.18) | 0.878 |
| FAS | - | - | 0.96 (0.93, 0.99) | 0.010 | 0.96 (0.93, 0.99) | 0.010 | 0.95 (0.86, 1.05) | 0.328 | 0.95 (0.86, 1.05) | 0.334 |
| Girl*2021 | - | - | - | - | 1.11 (0.86, 1.44) | 0.411 | - | - | 1.12 (0.87, 1.45) | 0.376 |
| Girl*2023 | - | - | - | - | 1.22 (0.99, 1.50) | 0.067 | - | - | 1.22 (0.99, 1.50) | 0.066 |
| Girl*2024 | - | - | - | - | 1.18 (0.97, 1.44) | 0.103 | - | - | 1.18 (0.97, 1.44) | 0.102 |
| FAS*2021 | - | - | - | - | - | - | 1.07 (0.94, 1.22) | 0.322 | 1.06 (0.94, 1.21) | 0.339 |
| FAS*2023 | - | - | - | - | - | - | 0.99 (0.89, 1.11) | 0.913 | 0.99 (0.89, 1.11) | 0.890 |
| FAS*2024 | - | - | - | - | - | - | 1.01 (0.91, 1.13) | 0.794 | 1.01 (0.91, 1.13) | 0.807 |
| Wald test compared to: | - | - | Model 1: Chi2 = 35.50; p<0.001 | | Model 2: Chi2 = 3.86; p=0.2768 | | Model 2: Chi2 = 2.71; p=0.5369 | | Model 2: Chi2 = 5.59; p=0.4707  Model 3: Chi2 = 2.09; p=0.5530  Model 4: Chi2 = 3.81; p=0.2828 | |

**LIKING SCHOOL**

| Liking school (n=23,200) – **UNWEIGHTED ESTIMATES** using multi-level logistic regression | | | | | | | | |
| --- | --- | --- | --- | --- | --- | --- | --- | --- |
|  | Model 2  [Adjusted] | | Interaction effects: Model 3  [Gender*Survey year] | | Interaction effects: Model 4  [Family affluence*Survey year] | | Interaction effects: Model 5  [Gender*Survey year + Family affluence*Survey year] | |
|  | OR, 95% CI | P value | OR, 95%CI | P value | OR, 95%CI | P value | OR, 95%CI | P value |
| 2021 | 0.92 (0.76, 1.11) | 0.390 | 0.93 (0.73, 1.19) | 0.566 | 0.92 (0.76, 1.12) | 0.418 | 0.93 (0.72, 1.19) | 0.548 |
| 2023 | 0.88 (0.75, 1.02) | 0.090 | 0.79 (0.66, 0.96) | 0.016 | 0.88 (0.75, 1.02) | 0.094 | 0.79 (0.66, 0.96) | 0.017 |
| 2024 | 0.66 (0.57, 0.76) | <0.001 | 0.63 (0.52, 0.75) | <0.001 | 0.66 (0.57, 0.77) | <0.001 | 0.63 (0.52, 0.75) | <0.001 |
| Girl | 1.48 (1.38, 1.57) | <0.001 | 1.29 (1.02, 1.61) | 0.030 | 1.48 (1.39, 1.58) | <0.001 | 1.29 (1.02, 1.62) | 0.030 |
| FAS | 1.05 (1.02, 1.09) | 0.002 | 1.05 (1.02, 1.09) | 0.002 | 1.05 (0.93, 1.18) | 0.449 | 1.05 (0.93, 1.18) | 0.441 |
| Girl*2021 | - | - | 0.98 (0.70, 1.38) | 0.925 | - | - | 1.00 (0.71, 1.41) | 0.996 |
| Girl*2023 | - | - | 1.26 (0.97, 1.62) | 0.078 | - | - | 1.26 (0.98, 1.62) | 0.077 |
| Girl*2024 | - | - | 1.13 (0.89, 1.44) | 0.319 | - | - | 1.13 (0.89, 1.44) | 0.318 |
| FAS*2021 | - | - | - | - | 1.22 (1.02, 1.46) | 0.026 | 1.22 (1.02, 1.45) | 0.029 |
| FAS*2023 | - | - | - | - | 0.95 (0.83, 1.08) | 0.437 | 0.95 (0.83, 1.08) | 0.427 |
| FAS*2024 | - | - | - | - | 1.02 (0.90, 1.16) | 0.733 | 1.02 (0.90, 1.16) | 0.741 |
| Lrtest compared to: | Model 1: Chi2 = 152.91; p<0.001 | | Model 2: Chi2 = 5.41; p=0.1442 | | Model 2: Chi2 = 12.45; p=0.0060 | | Model 2: Chi2 = 17.57; p=0.0074  Model 3: Chi2 = 12.16; p=0.0068  Model 4: Chi2 = 5.12; p=0.1630 | |

Best fitting model is Model 4 [with family affluence*survey year interaction].

**Margins plot for interaction effect (unweighted estimates):**

**Lincom estimates for interaction effects:**

|  | **Effect of family affluence within survey year** | | | |
| --- | --- | --- | --- | --- |
| **Subgroup of students:** | **2019 survey** | **2021 survey** | **2023 survey** | **2024 survey** |
| **Predictor:** | *Family affluence* | *Family affluence* | *Family affluence* | *Family affluence* |
| **OUTCOME** |  |  |  |  |
| Liking schools (OR, 95%CI) | 1.05 (0.93, 1.18); p=0.449 | 1.28 (1.12, 1.46); p<0.001 | 0.99 (0.94, 1.05); p=0.828 | 1.07 (1.02, 1.12); p=0.003 |

|  | **Test of gradient effect** | | |
| --- | --- | --- | --- |
| **Survey year** | **2021 survey** | **2023 survey** | **2024 survey** |
| **Reference category** | *2019 survey* | *2019 survey* | *2019 survey* |
| **OUTCOME** |  |  |  |
| Liking schools  (OR, 95%CI) | 1.22 (1.02, 1.46) p=0.026 | 0.95 (0.83, 1.08) p=0.437 | 1.02 (0.90, 1.16) p=0.733 |

| Liking school (n=23,200) – **ESTIMATES WEIGHTED BY LOCAL AUTHORITY** using multi-level logistic regression | | | | | | | | | | |
| --- | --- | --- | --- | --- | --- | --- | --- | --- | --- | --- |
|  | Model 1  [Main effect of cohort] | | Model 2  [Adjusted] | | Interaction effects: Model 3  [Gender*Survey year] | | Interaction effects: Model 4  [Family affluence*Survey year] | | Interaction effects: Model 5  [Gender*Survey year + Family affluence*Survey year] | |
|  | OR, 95% CI | P value | OR, 95% CI | P value | OR, 95%CI | P value | OR, 95%CI | P value | OR, 95%CI | P value |
| 2021 | 0.94 (0.72, 1.23) | 0.649 | 0.94 (0.70, 1.25) | 0.660 | 0.91 (0.63, 1.30) | 0.596 | 0.93 (0.70, 1.25) | 0.641 | 0.89 (0.62, 1.28) | 0.530 |
| 2023 | 0.86 (0.70, 1.05) | 0.141 | 0.89 (0.72, 1.10) | 0.287 | 0.79 (0.60, 1.03) | 0.078 | 0.89 (0.72, 1.11) | 0.314 | 0.79 (0.60, 1.03) | 0.087 |
| 2024 | 0.67 (0.55, 0.80) | <0.001 | 0.66 (0.54, 0.81) | <0.001 | 0.62 (0.48, 0.81) | <0.001 | 0.67 (0.54, 0.82) | <0.001 | 0.63 (0.48, 0.81) | <0.001 |
| Girl | - | - | 1.50 (1.38, 1.62) | <0.001 | 1.26 (0.94, 1.69) | 0.116 | 1.50 (1.39, 1.63) | <0.001 | 1.26 (0.94, 1.69) | 0.116 |
| FAS | - | - | 1.05 (1.01, 1.09) | 0.018 | 1.05 (1.01, 1.09) | 0.018 | 1.04 (0.91, 1.19) | 0.570 | 1.04 (0.91, 1.19) | 0.563 |
| Girl*2021 | - | - | - | - | 1.08 (0.69, 1.71) | 0.731 | - | - | 1.12 (0.71, 1.77) | 0.633 |
| Girl*2023 | - | - | - | - | 1.33 (0.97, 1.82) | 0.079 | - | - | 1.33 (0.97, 1.82) | 0.079 |
| Girl*2024 | - | - | - | - | 1.15 (0.85, 1.56) | 0.356 | - | - | 1.15 (0.85, 1.56) | 0.355 |
| FAS*2021 | - | - | - | - | - | - | 1.23 (1.00, 1.52) | 0.051 | 1.23 (0.99, 1.52) | 0.056 |
| FAS*2023 | - | - | - | - | - | - | 0.96 (0.82, 1.11) | 0.558 | 0.95 (0.82, 1.11) | 0.549 |
| FAS*2024 | - | - | - | - | - | - | 1.02 (0.87, 1.18) | 0.841 | 1.01 (0.87, 1.18) | 0.852 |
| Wald test compared to: | - | - | Model 1: Chi2 = 99.74; p<0.001 | | Model 2: Chi2 = 4.52; p=0.2107 | | Model 2: Chi2 = 8.91; p=0.0305 | | Model 2: Chi2 = 14.30; p=0.0265  Model 3: Chi2 = 8.76; p=0.0327  Model 4: Chi2 = 4.32; p=0.2292 | |

|  | **Effect of family affluence within survey year – ESTIMATES WEIGHTED BY LOCAL AUTHORITY** | | | |
| --- | --- | --- | --- | --- |
| **Subgroup of students:** | **2019 survey** | **2021 survey** | **2023 survey** | **2024 survey** |
| **Predictor:** | *Family affluence* | *Family affluence* | *Family affluence* | *Family affluence* |
| **OUTCOME** |  |  |  |  |
|  |  |  |  |  |
| Liking schools  (OR, 95%CI) | 1.04 (0.91, 1.19); p=0.570 | 1.28 (1.09, 1.51); p=0.003 | 0.99 (0.93, 1.06); p=0.855 | 1.06 (1.00, 1.11); p=0.042 |

**Lincom estimates for interaction effects (weighted estimates)**

**:**

|  | **Test of gradient effect** | | |
| --- | --- | --- | --- |
| **Survey year** | **2021 survey** | **2023 survey** | **2024 survey** |
| **Reference category** | *2019 survey* | *2019 survey* | *2019 survey* |
| **OUTCOME** |  |  |  |
| Liking schools  (OR, 95%CI) | 1.23 (1.00, 1.53) p=0.051 | 0.96 (0.82, 1.11) p=0.558 | 1.02 (0.87, 1.18) p=0.841 |

**School belonging**

| School belonging (n=22,394**) *–* UNWEIGHTED ESTIMATES** using multi-level logistic regression | | | | | | | | |
| --- | --- | --- | --- | --- | --- | --- | --- | --- |
|  | Model 2  [Adjusted] | | Interaction effects: Model 3  [Gender*Survey year] | | Interaction effects: Model 4  [Family affluence*Survey year] | | Interaction effects: Model 5  [Gender*Survey year + Family affluence*Survey year] | |
|  | OR, 95% CI | P value | OR, 95%CI | P value | OR, 95%CI | P value | OR, 95%CI | P value |
| 2021 | 0.93 (0.78, 1.12) | 0.439 | 1.09 (0.86, 1.40) | 0.472 | 0.93 (0.78, 1.12) | 0.452 | 1.10 (0.86, 1.40) | 0.455 |
| 2023 | 0.82 (0.71, 0.95) | 0.007 | 0.89 (0.74, 1.07) | 0.200 | 0.82 (0.71, 0.95) | 0.007 | 0.89 (0.74, 1.07) | 0.207 |
| 2024 | 0.90 (0.79, 1.04) | 0.143 | 0.94 (0.78, 1.12) | 0.482 | 0.90 (0.79, 1.04) | 0.154 | 0.94 (0.79, 1.12) | 0.504 |
| Girl | 1.05 (0.99, 1.12) | 0.131 | 1.18 (0.95, 1.47) | 0.138 | 1.05 (0.99, 1.12) | 0.127 | 1.18 (0.95, 1.48) | 0.133 |
| FAS | 1.08 (1.05, 1.12) | <0.001 | 1.08 (1.05, 1.12) | <0.001 | 1.04 (0.93, 1.16) | 0.502 | 1.04 (0.93, 1.16) | 0.521 |
| Girl*2021 | - | - | 0.73 (0.52, 1.01) | 0.055 | - | - | 0.72 (0.52, 1.00) | 0.053 |
| Girl*2023 | - | - | 0.85 (0.67, 1.09) | 0.208 | - | - | 0.85 (0.67, 1.09) | 0.205 |
| Girl*2024 | - | - | 0.92 (0.72, 1.17) | 0.490 | - | - | 0.92 (0.72, 1.17) | 0.483 |
| FAS*2021 | - | - | - | - | 1.03 (0.87, 1.23) | 0.713 | 1.03 (0.87, 1.22) | 0.730 |
| FAS*2023 | - | - | - | - | 1.01 (0.90, 1.15) | 0.819 | 1.02 (0.90, 1.15) | 0.796 |
| FAS*2024 | - | - | - | - | 1.06 (0.94, 1.20) | 0.325 | 1.06 (0.94, 1.20) | 0.311 |
| Lrtest compared to: | Model 1: Chi2 = 23.44; p<0.001 | | Model 2: Chi2 = 4.91; p=0.1784 | | Model 2: Chi2 = 2.19; p=0.5330 | | Model 2: Chi2 = 7.16; p=0.3064  Model 3: Chi2 = 2.25; p=0.5227  Model 4: Chi2 = 4.96; p=0.1745 | |

| School belonging (n=22,394**) – ESTIMATES WEIGHTED BY LOCAL AUTHORITY** using multi-level logistic regression | | | | | | | | | | |
| --- | --- | --- | --- | --- | --- | --- | --- | --- | --- | --- |
|  | Model 1  [Main effect of cohort] | | Model 2  [Adjusted] | | Interaction effects: Model 3  [Gender*Survey year] | | Interaction effects: Model 4  [Family affluence*Survey year] | | Interaction effects: Model 5  [Gender*Survey year + Family affluence*Survey year] | |
|  | OR, 95% CI | P value | OR, 95% CI | P value | OR, 95%CI | P value | OR, 95%CI | P value | OR, 95%CI | P value |
| 2021 | 0.93 (0.75, 1.16) | 0.524 | 0.94 (0.75, 1.19) | 0.623 | 1.05 (0.80, 1.37) | 0.741 | 0.94 (0.75, 1.19) | 0.621 | 1.05 (0.80, 1.37) | 0.741 |
| 2023 | 0.78 (0.66, 0.93) | 0.005 | 0.82 (0.69, 0.99) | 0.035 | 0.86 (0.71, 1.06) | 0.157 | 0.82 (0.69, 0.99) | 0.036 | 0.86 (0.71, 1.06) | 0.162 |
| 2024 | 0.86 (0.73, 1.02) | 0.079 | 0.90 (0.75, 1.07) | 0.227 | 0.91 (0.74, 1.11) | 0.345 | 0.90 (0.75, 1.07) | 0.235 | 0.91 (0.74, 1.11) | 0.356 |
| Girl | - | - | 1.06 (0.99, 1.14) | 0.113 | 1.13 (0.87, 1.44) | 0.328 | 1.06 (0.99, 1.14) | 0.109 | 1.13 (0.89, 1.44) | 0.325 |
| FAS | - | - | 1.07 (1.03, 1.11) | <0.001 | 1.07 (1.03, 1.11) | 0.001 | 1.05 (0.93, 1.17) | 0.423 | 1.05 (0.93, 1.17) | 0.423 |
| Girl*2021 | - | - | - | - | 0.81 (0.56, 1.18) | 0.281 | - | - | 0.81 (0.56, 1.18) | 0.281 |
| Girl*2023 | - | - | - | - | 0.91 (0.70, 1.18) | 0.462 | - | - | 0.91 (0.70, 1.18) | 0.460 |
| Girl*2024 | - | - | - | - | 0.98 (0.75, 1.26) | 0.850 | - | - | 0.97 (0.75, 1.26) | 0.847 |
| FAS*2021 | - | - | - | - | - | - | 1.03 (0.87, 1.22) | 0.720 | 1.03 (0.87, 1.22) | 0.761 |
| FAS*2023 | - | - | - | - | - | - | 1.00 (0.87, 1.14) | 0.945 | 1.00 (0.87, 1.14) | 0.958 |
| FAS*2024 | - | - | - | - | - | - | 1.04 (0.91, 1.18) | 0.595 | 1.04 (0.91, 1.18) | 0.584 |
| Wald test compared to: | - | - | Model 1: Chi2 = 14.47; p<0.001 | | Model 2: Chi2 = 2.35; p=0.5028 | | Model 2: Chi2 = 1.09; p=0.7788 | | Model 2: Chi2 = 3.47; p=0.0.7484  Model 3: Chi2 = 1.07; p=0.7837  Model 4: Chi2 = 2.35; p=0.5028 | |

**Adult to confide in**

| Adult to confide in (n=22,651) **– UNWEIGHTED ESTIMATES** using multi-level logistic regression | | | | | | | | |
| --- | --- | --- | --- | --- | --- | --- | --- | --- |
|  | Model 2  [Adjusted] | | Interaction effects: Model 3  [Gender*Survey year] | | Interaction effects: Model 4  [Family affluence*Survey year] | | Interaction effects: Model 5  [Gender*Survey year + Family affluence*Survey year] | |
|  | OR, 95% CI | P value | OR, 95%CI | P value | OR, 95%CI | P value | OR, 95%CI | P value |
| 2021 | 0.81 (0.66, 0.99) | 0.037 | 0.93 (0.71, 1.21) | 0.565 | 0.82 (0.67, 1.00) | 0.047 | 0.94 (0.72, 1.22) | 0.637 |
| 2023 | 0.90 (0.77, 1.05) | 0.178 | 0.86 (0.70, 1.05) | 0.143 | 0.90 (0.76, 1.05) | 0.176 | 0.86 (0.70, 1.05) | 0.137 |
| 2024 | 0.79 (0.68, 0.92) | 0.003 | 0.84 (0.69, 1.02) | 0.083 | 0.79 (0.68, 0.92) | 0.003 | 0.84 (0.69, 1.02) | 0.076 |
| Girl | 1.31 (1.22, 1.41) | <0.001 | 1.39 (1.07, 1.80) | 0.013 | 1.31 (1.22, 1.41) | <0.001 | 1.39 (1.07, 1.79) | 0.013 |
| FAS | 0.96 (0.93, 1.00) | 0.048 | 0.96 (0.93, 1.00) | 0.043 | 1.00 (0.88, 1.14) | 0.982 | 1.00 (0.88, 1.14) | 0.989 |
| Girl*2021 | - | - | 0.76 (0.52, 1.09) | 0.138 | - | - | 0.75 (0.52, 1.09) | 0.128 |
| Girl*2023 | - | - | 1.10 (0.82, 1.47) | 0.518 | - | - | 1.10 (0.83, 1.47) | 0.501 |
| Girl*2024 | - | - | 0.88 (0.67, 1.16) | 0.362 | - | - | 0.88 (0.67, 1.16) | 0.374 |
| FAS*2021 | - | - | - | - | 0.88 (0.72, 1.06) | 0.185 | 0.87 (0.72, 1.06) | 0.165 |
| FAS*2023 | - | - | - | - | 0.91 (0.79, 1.05) | 0.212 | 0.91 (0.79, 1.05) | 0.210 |
| FAS*2024 | - | - | - | - | 1.00 (0.87, 1.15) | 0.976 | 1.00 (0.87, 1.15) | 0.981 |
| Lrtest compared to: | Model 1: Chi2 = 60.11; p<0.001 | | Model 2: Chi2 = 10.64; p=0.0138 | | Model 2: Chi2 = 6.96; p=0.0731 | | Model 2: Chi2 = 17.91; p=0.0065  Model 3: Chi2 = 7.27; p=0.0637  Model 4: Chi2 = 10.95; p=0.0120 | |

Best fitting model is with gender*survey year interaction (model 3):

**Margins plot for interaction effect (unweighted estimates):**

**=**

|  | **Effect of gender within survey year - UNWEIGHTED ESTIMATES** | | | |
| --- | --- | --- | --- | --- |
| **Subgroup of students:** | **2019 survey** | **2021 survey** | **2023 survey** | **2024 survey** |
| **Predictor:** | *Girl* | *Girl* | *Girl* | *Girl* |
| **Reference category** | *Boy* | *Boy* | *Boy* | *Boy* |
| **OUTCOME** |  |  |  |  |
| Adult to confide in (OR 95%CI) | 1.39 (1.07, 1.79) p=0.013 | 1.04 (0.80, 1.35) p=0.768 | 1.53 (1.35, 1.73) p<0.001 | 1.22 (1.11, 1.35) p<0.001 |

|  | **Effect of survey year within gender - UNWEIGHTED ESTIMATES** | | | | | |
| --- | --- | --- | --- | --- | --- | --- |
| **Subgroup of students:** | **Boys** | | | **Girls** | | |
| **Predictor:** | *2021 survey* | *2023 survey* | *2024 survey* | *2021 survey* | *2023 survey* | *2024 survey* |
| **Reference category** | *2019 survey* | *2019 survey* | *2019 survey* | *2019 survey* | *2019 survey* | *2019 survey* |
| **OUTCOME** |  |  |  |  |  |  |
| Adult to confide in (OR 95%CI) | 0.94 (0.72, 1.22); p=0.637 | 0.86 (0.70, 1.05); p=0.137 | 0.84 (0.69, 1.02); p=0.076 | 0.70 (0.53, 0.93); p=0.014 | 0.95 (0.75, 1.19); p=0.634 | 0.74 (0.59, 0.92); p=0.006 |

| Adult to confide in (n=22,651) **– ESTIMATES WEIGHTED BY LOCAL AUTHORITY** | | | | | | | | | | |
| --- | --- | --- | --- | --- | --- | --- | --- | --- | --- | --- |
|  | Model 1  [Main effect of cohort] | | Model 2  [Adjusted] | | Interaction effects: Model 3  [Gender*Survey year] | | Interaction effects: Model 4  [Family affluence*Survey year] | | Interaction effects: Model 5  [Gender*Survey year + Family affluence*Survey year] | |
|  | OR, 95% CI | P value | OR, 95% CI | P value | OR, 95%CI | P value | OR, 95%CI | P value | OR, 95%CI | P value |
| 2021 | 0.82 (0.64, 1.05) | 0.110 | 0.82 (0.64, 1.06) | 0.130 | 0.93 (0.68, 1.26) | 0.633 | 0.84 (0.65, 1.07) | 0.161 | 0.95 (0.71, 1.28) | 0.747 |
| 2023 | 0.88 (0.74, 1.04) | 0.140 | 0.91 (0.77, 1.08) | 0.298 | 0.87 (0.70, 1.08) | 0.210 | 0.91 (0.77, 1.09) | 0.300 | 0.87 (0.70, 1.08) | 0.207 |
| 2024 | 0.76 (0.64, 0.89) | 0.001 | 0.78 (0.66, 0.92) | 0.004 | 0.84 (0.68, 1.03) | 0.096 | 0.78 (0.66, 0.92) | 0.003 | 0.83 (0.67, 1.03) | 0.088 |
| Girl | - | - | 1.33 (1.23, 1.44) | <0.001 | 1.42 (1.09, 1.84) | 0.009 | 1.33 (1.22, 1.44) | <0.001 | 1.41 (1.09, 1.84) | 0.010 |
| FAS | - | - | 0.95 (0.91, 0.99) | 0.009 | 0.95 (0.91, 0.99) | 0.007 | 0.99 (0.87, 1.12) | 0.838 | 0.99 (0.87, 1.12) | 0.829 |
| Girl*2021 | - | - | - | - | 0.78 (0.54, 1.11) | 0.164 | - | - | 0.76 (0.54, 1.09) | 0.134 |
| Girl*2023 | - | - | - | - | 1.11 (0.83, 1.48) | 0.478 | - | - | 1.11 (0.83, 1.49) | 0.464 |
| Girl*2024 | - | - | - | - | 0.87 (0.65, 1.15) | 0.327 | - | - | 0.87 (0.65, 1.16) | 0.341 |
| FAS*2021 | - | - | - | - | - | - | 0.88 (0.71, 1.08) | 0.223 | 0.87 (0.70, 1.07) | 0.187 |
| FAS*2023 | - | - | - | - | - | - | 0.92 (0.79, 1.07) | 0.266 | 0.92 (0.79, 1.07) | 0.265 |
| FAS*2024 | - | - | - | - | - | - | 1.00 (0.87, 1.14) | 0.952 | 1.00 (0.87, 1.14) | 0.958 |
| Wald test compared to: | - | - | Model 1: Chi2 = 54.89; p<0.001 | | Model 2: Chi2 = 9.08; p=0.0282 | | Model 2: Chi2 = 4.17; p=0.2436 | | Model 2: Chi2 = 16.41; p=0.0117  Model 3: Chi2 = 4.46; p=0.2156  Model 4: Chi2 = 9.69; p=0.0214 | |

|  | **Effect of gender within survey year – ESTIMATES WEIGHTED BY LOCAL AUTHORITY** | | | |
| --- | --- | --- | --- | --- |
| **Subgroup of students:** | **2019 survey** | **2021 survey** | **2023 survey** | **2024 survey** |
| **Predictor:** | *Girl* | *Girl* | *Girl* | *Girl* |
| **Reference category** | *Boy* | *Boy* | *Boy* | *Boy* |
| **OUTCOME** |  |  |  |  |
| Adult to confide in (OR 95%CI) | 1.42 (1.09, 1.84) p=0.009 | 1.10 (0.86, 1.41) p=0.450 | 1.57 (1.36, 1.82) p<0.001 | 1.23 (1.10, 1.37) p<0.001 |

|  | **Effect of survey year within gender - ESTIMATES WEIGHTED BY LOCAL AUTHORITY** | | | | | |
| --- | --- | --- | --- | --- | --- | --- |
| **Subgroup of students:** | **Boys** | | | **Girls** | | |
| **Predictor:** | *2021 survey* | *2023 survey* | *2024 survey* | *2021 survey* | *2023 survey* | *2024 survey* |
| **Reference category** | *2019 survey* | *2019 survey* | *2019 survey* | *2019 survey* | *2019 survey* | *2019 survey* |
| **OUTCOME** |  |  |  |  |  |  |
| Adult to confide in (OR 95%CI) | 0.93 (0.68, 1.26); p=0.633 | 0.87 (0.70, 1.08); p=0.210 | 0.84 (0.68, 1.03); p=0.096 | 0.72 (0.53, 0.98); p=0.039 | 0.97 (0.76, 1.22); p=0.775 | 0.73 (0.58, 0.91); p=0.005 |
