# Supplementary material for: Trends in student perceptions of school connectedness from 2001 to 2024: Context before and immediately after the implementation of the Whole School Approach to emotional and mental wellbeing in Wales
Source: Research Square preprint supplement (doi:10.21203/rs.3.rs-8659762/v1), 2026-01-30
Supplement: Supplementary file 3 [file 78376ee7f9372eef8409110d.docx]

**APPENDIX 5: SECONDARY SCHOOL ANALYSES**

For each outcome:

1. Regression estimates for all models

2. Trends graphs based on average values by survey year

| **Staff-student relationships (n=216,589)** | | | | | | | | |
| --- | --- | --- | --- | --- | --- | --- | --- | --- |
|  | Interaction effects: Model 3  [Gender*Survey year] | | Interaction effects: Model 4  [Family affluence*Survey year] | | Interaction effects: Model 5  [Grade*Survey year] | | Interaction effects: Model 6  [Gender*Survey year + Family affluence*Survey year + Grade*Survey year] | |
|  | **OR, 95%CI** | **P value** | **OR, 95%CI** | **P value** | **OR, 95%CI** | **P value** | **OR, 95%CI** | **P value** |
| **2013** | **ref** | **-** | **ref** | **-** | **ref** | **-** | **ref** | **-** |
| 2017 | 1.06 (0.99, 1.13) | 0.083 | 0.99 (0.92, 1.07) | 0.849 | 1.18 (1.07, 1.31) | 0.001 | 1.27 (1.12, 1.43) | <0.001 |
| 2019 | 1.23 (1.15, 1.31) | <0.001 | 1.04 (0.96, 1.12) | 0.329 | 1.34 (1.21, 1.48) | <0.001 | 1.42 (1.26, 1.61) | <0.001 |
| 2021 | 1.08 (1.01, 1.15) | 0.015 | 0.86 (0.80, 0.93) | <0.001 | 0.93 (0.85, 1.02) | 0.132 | 1.16 (1.03, 1.30) | 0.012 |
| 2023 | 0.97 (0.92, 1.03) | 0.330 | 0.71 (0.67, 0.76) | <0.001 | 0.80 (0.73, 0.87) | <0.001 | 0.97 (0.87, 1.08) | 0.534 |
| Girl | 0.91 (0.84, 0.98) | 0.011 | 0.62 (0.61, 0.63) | <0.001 | 0.62 (0.61, 0.63) | <0.001 | 0.91 (0.84, 0.98) | 0.010 |
| Medium FAS | 1.07 (1.05, 1.09) | <0.001 | 0.96 (0.88, 1.05) | 0.342 | 1.07 (1.06, 1.09) | <0.001 | 0.96 (0.88, 1.05) | 0.412 |
| High FAS | 1.12 (1.09, 1.14) | <0.001 | 1.09 (0.99, 1.19) | 0.067 | 1.11 (1.09, 1.14) | <0.001 | 1.09 (1.00, 1.20) | 0.059 |
| Year 8 | 0.45 (0.44, 0.46) | <0.001 | 0.45 (0.44, 0.46) | <0.001 | 0.49 (0.44, 0.55) | <0.001 | 0.50 (0.44, 0.56) | <0.001 |
| Year 9 | 0.32 (0.31, 0.32) | <0.001 | 0.32 (0.31, 0.32) | <0.001 | 0.36 (0.32, 0.40) | <0.001 | 0.36 (0.32, 0.41) | <0.001 |
| Year 10 | 0.28 (0.27, 0.29) | <0.001 | 0.28 (0.28, 0.29) | <0.001 | 0.32 (0.29, 0.36) | <0.001 | 0.32 (0.29, 0.36) | <0.001 |
| Year 11 | 0.32 (0.31, 0.33) | <0.001 | 0.32 (0.31, 0.33) | <0.001 | 0.34 (0.30, 0.39) | <0.001 | 0.34 (0.30, 0.39) | <0.001 |
| Girl * 2017 | 0.88 (0.80, 0.96) | 0.003 | - | - | - | - | 0.88 (0.80, 0.96) | 0.003 |
| Girl * 2019 | 0.81 (0.74, 0.88) | <0.001 | - | - | - | - | 0.81 (0.74, 0.88) | <0.001 |
| Girl * 2021 | 0.65 (0.60, 0.71) | <0.001 | - | - | - | - | 0.65 (0.60, 0.71) | <0.001 |
| Girl * 2023 | 0.62 (0.57, 0.67) | <0.001 | - | - | - | - | 0.62 (0.57, 0.67) | <0.001 |
| Medium FAS*2017 | - | - | 1.08 (0.98, 1.20) | 0.13 | - | - | 1.08 (0.97, 1.20) | 0.144 |
| High FAS*2017 |  |  | 0.94 (0.84, 1.04) | 0.231 |  |  | 0.94 (0.84, 1.04) | 0.226 |
| Medium FAS*2019 |  |  | 1.14 (1.03, 1.27) | 0.013 |  |  | 1.14 (1.02, 1.26) | 0.017 |
| High FAS*2019 | - | - | 1.04 (0.94, 1.16) | 0.433 | - | - | 1.05 (0.94, 1.16) | 0.413 |
| Medium FAS*2021 |  |  | 1.08 (0.98, 1.19) | 0.128 |  |  | 1.07 (0.97, 1.18) | 0.163 |
| High FAS*2021 | - | - | 0.96 (0.87, 1.07) | 0.466 | - | - | 0.96 (0.87, 1.06) | 0.445 |
| Medium FAS*2023 |  |  | 1.16 (1.05, 1.27) | 0.002 |  |  | 1.15 (1.05, 1.26) | 0.004 |
| High FAS*2023 | - | - | 1.07 (0.97, 1.17) | 0.195 | - | - | 1.06 (0.97, 1.17) | 0.207 |
| Year 8*2017 | - | - | - | - | 0.93 (0.81, 1.06) | 0.271 | 0.91 (0.80, 1.05) | 0.196 |
| Year 8*2019 | - | - | - | - | 0.85 (0.74, 0.97) | 0.018 | 0.84 (0.73, 0.96) | 0.010 |
| Year 8*2021 | - | - | - | - | 1.00 (0.88, 1.13) | 0.939 | 0.98 (0.86, 1.11) | 0.770 |
| Year 8*2023 | - | - | - | - | 0.89 (0.79, 1.01) | 0.063 | 0.88 (0.78, 0.99) | 0.035 |
| Year 9*2017 | - | - | - | - | 0.81 (0.71, 0.93) | 0.003 | 0.80 (0.70, 0.92) | 0.001 |
| Year 9*2019 | - | - | - | - | 0.76 (0.67, 0.87) | <0.001 | 0.75 (0.65, 0.86) | <0.001 |
| Year 9*2021 | - | - | - | - | 0.96 (0.85, 1.09) | 0.524 | 0.95 (0.84, 1.07) | 0.383 |
| Year 9*2023 | - | - | - | - | 0.88 (0.78, 0.99) | 0.030 | 0.86 (0.76, 0.97) | 0.014 |
| Year 10*2017 | - | - | - | - | 0.76 (0.66, 0.87) | <0.001 | 0.75 (0.66, 0.86) | <0.001 |
| Year 10*2019 | - | - | - | - | 0.75 (0.65, 0.86) | <0.001 | 0.75 (0.65, 0.85) | <0.001 |
| Year 10*2021 | - | - | - | - | 0.85 (0.75, 0.97) | 0.014 | 0.85 (0.75, 0.97) | 0.013 |
| Year 10*2023 | - | - | - | - | 0.94 (0.83, 1.06) | 0.305 | 0.94 (0.83, 1.06) | 0.284 |
| Year 11*2017 | - | - | - | - | 0.72 (0.63, 0.83) | <0.001 | 0.72 (0.62, 0.82) | <0.001 |
| Year 11*2019 | - | - | - | - | 0.75 (0.65, 0.87) | <0.001 | 0.75 (0.65, 0.86) | <0.001 |
| Year 11*2021 | - | - | - | - | 0.85 (0.75, 0.97) | 0.017 | 0.85 (0.74, 0.97) | 0.013 |
| Year 11*2023 | - | - | - | - | 1.08 (0.95, 1.22) | 0.246 | 1.07 (0.94, 1.21) | 0.301 |
| Lrtest compared to: | Model 2: Chi2 = 378.79; p<0.001 | | Model 2: Chi2 = 37.42; p<0.001 | | Model 2: Chi2 = 329.62; p<0.001 | | Model 3: Chi2 = 368.19; p<0.001  Model 4: Chi2 = 709.55; p<0.001  Model 5: Chi2 = 417.36; p<0.001 | |

| **Student relationships (n=238,055)** | | | | | | | | |
| --- | --- | --- | --- | --- | --- | --- | --- | --- |
|  | Interaction effects: Model 3  [Gender*Survey year] | | Interaction effects: Model 4  [Family affluence*Survey year] | | Interaction effects: Model 5  [Grade*Survey year] | | Interaction effects: Model 6  [Gender*Survey year + Family affluence*Survey year + Grade*Survey year] | |
|  | **OR, 95%CI** | **P value** | **OR, 95%CI** | **P value** | **OR, 95%CI** | **P value** | **OR, 95%CI** | **P value** |
| 2001 | 0.89 (0.81, 0.98) | 0.024 | 0.93 (0.82, 1.05) | 0.218 | 0.75 (0.66, 0.87) | <0.001 | 0.90 (0.75, 1.08) | 0.236 |
| 2003 | 0.89 (0.81, 0.97) | 0.008 | 0.91 (0.82, 1.02) | 0.104 | 0.69 (0.60, 0.80) | <0.001 | 0.74 (0.62, 0.87) | 0.001 |
| 2005 | 0.70 (0.63, 0.77) | <0.001 | 0.69 (0.61, 0.78) | <0.001 | 0.53 (0.46, 0.61) | <0.001 | 0.53 (0.44, 0.63) | <0.001 |
| **2009** | **ref** | **-** | **ref** | **-** | **Ref** | **-** | **Ref** | **-** |
| 2013 | 0.76 (0.70, 0.83) | <0.001 | 0.72 (0.66, 0.80) | <0.001 | 0.77 (0.68, 0.87) | <0.001 | 0.88 (0.75, 1.02) | 0.093 |
| 2017 | 0.64 (0.60, 0.69) | <0.001 | 0.50 (0.46, 0.54) | <0.001 | 0.73 (0.65, 0.81) | <0.001 | 0.85 (0.75, 0.97) | 0.019 |
| 2019 | 0.72 (0.67, 0.77) | <0.001 | 0.52 (0.48, 0.57) | <0.001 | 0.78 (0.70, 0.87) | <0.001 | 0.98 (0.86, 1.12) | 0.737 |
| 2021 | 0.61 (0.57, 0.66) | <0.001 | 0.48 (0.44, 0.51) | <0.001 | 0.58 (0.52, 0.64) | <0.001 | 0.81 (0.71, 0.91) | 0.001 |
| 2023 | 0.53 (0.49, 0.57) | <0.001 | 0.34 (0.32, 0.37) | <0.001 | 0.45 (0.41, 0.50) | <0.001 | 0.65 (0.58, 0.74) | <0.001 |
| Girl | 1.01 (0.94, 1.10) | 0.723 | 0.57 (0.56, 0.58) | <0.001 | 0.57 (0.56, 0.58) | <0.001 | 1.01 (0.94, 1.09) | 0.756 |
| FAS: Medium | 1.22 (1.20, 1.24) | <0.001 | 1.21 (1.11, 1.32) | <0.001 | 1.22 (1.20, 1.24) | <0.001 | 1.20 (1.10, 1.31) | <0.001 |
| FAS: High | 1.40 (1.38, 1.43) | <0.001 | 1.34 (1.21, 1.49) | <0.001 | 1.40 (1.37, 1.42) | <0.001 | 1.32 (1.19, 1.47) | <0.001 |
| Year 8 | 0.56 (0.55, 0.57) | <0.001 | 0.56 (0.55, 0.57) | <0.001 | 0.71 (0.63, 0.80) | <0.001 | 0.70 (0.62, 0.79) | <0.001 |
| Year 9 | 0.44 (0.43, 0.45) | <0.001 | 0.44 (0.43, 0.45) | <0.001 | 0.60 (0.53, 0.68) | <0.001 | 0.61 (0.54, 0.69) | <0.001 |
| Year 10 | 0.37 (0.36, 0.38) | <0.001 | 0.37 (0.36, 0.38) | <0.001 | 0.53 (0.47, 0.61) | <0.001 | 0.53 (0.47, 0.60) | <0.001 |
| Year 11 | 0.39 (0.38, 0.40) | <0.001 | 0.39 (0.38, 0.40) | <0.001 | 0.45 (0.40, 0.51) | <0.001 | 0.46 (0.40, 0.52) | <0.001 |
| Girl*2001 | 0.87 (0.76, 0.99) | 0.042 | - | - | - | - | 0.86 (0.75, 0.99) | 0.034 |
| Girl*2003 | 0.94 (0.84, 1.06) | 0.325 | - | - | - | - | 0.94 (0.84, 1.06) | 0.328 |
| Girl*2005 | 0.95 (0.84, 1.09) | 0.486 | - | - | - | - | 0.97 (0.85, 1.11) | 0.640 |
| Girl*2013 | 0.84 (0.75, 0.93) | 0.001 | - | - | - | - | 0.84 (0.75, 0.93) | 0.001 |
| Girl*2017 | 0.67 (0.61, 0.73) | <0.001 | - | - | - | - | 0.67 (0.61, 0.73) | <0.001 |
| Girl*2019 | 0.59 (0.54, 0.65) | <0.001 | - | - | - | - | 0.59 (0.54, 0.65) | <0.001 |
| Girl*2021 | 0.56 (0.52, 0.61) | <0.001 | - | - | - | - | 0.56 (0.52, 0.61) | <0.001 |
| Girl*2023 | 0.46 (0.42, 0.50) | <0.001 | - | - | - | - | 0.46 (0.43, 0.50) | <0.001 |
| Medium FAS*2001 | - | - | 0.87 (0.74, 1.02) | 0.081 | - | - | 0.90 (0.77, 1.05) | 0.180 |
| High FAS*2001 |  |  | 0.78 (0.65, 0.94) | 0.009 |  |  | 0.86 (0.72, 1.03) | 0.110 |
| Medium FAS*2003 | - | - | 0.88 (0.77, 1.01) | 0.066 | - | - | 0.92 (0.80, 1.05) | 0.229 |
| High FAS*2003 |  |  | 0.99 (0.85, 1.15) | 0.878 |  |  | 1.06 (0.91, 1.24) | 0.453 |
| Medium FAS*2005 | - | - | 1.03 (0.88, 1.21) | 0.707 | - | - | 1.06 (0.90, 1.24) | 0.504 |
| High FAS*2005 |  |  | 0.92 (0.77, 1.09) | 0.330 |  |  | 0.98 (0.82, 1.16) | 0.780 |
| Medium FAS*2013 | - | - | 0.91 (0.81, 1.03) | 0.147 | - | - | 0.92 (0.81, 1.04) | 0.195 |
| High FAS*2013 |  |  | 0.95 (0.83, 1.10) | 0.516 |  |  | 0.97 (0.84, 1.11) | 0.656 |
| Medium FAS*2017 | - | - | 1.07 (0.97, 1.19) | 0.184 | - | - | 1.08 (0.98, 1.20) | 0.129 |
| High FAS*2017 |  |  | 1.07 (0.95, 1.21) | 0.244 |  |  | 1.09 (0.97, 1.23) | 0.144 |
| Medium FAS*2019 | - | - | 1.04 (0.94, 1.16) | 0.413 | - | - | 1.05 (0.95, 1.17) | 0.344 |
| High FAS*2019 |  |  | 1.10 (0.98, 1.24) | 0.104 |  |  | 1.12 (1.00, 1.26) | 0.055 |
| Medium FAS*2021 | - | - | 0.94 (0.86, 1.04) | 0.222 | - | - | 0.95 (0.86, 1.04) | 0.280 |
| High FAS*2021 |  |  | 0.95 (0.85, 1.07) | 0.418 |  |  | 0.97 (0.87, 1.08) | 0.593 |
| Medium FAS*2023 | - | - | 1.03 (0.94, 1.13) | 0.521 | - | - | 1.04 (0.95, 1.13) | 0.453 |
| High FAS*2023 |  |  | 1.09 (0.98, 1.21) | 0.130 |  |  | 1.10 (0.99, 1.23) | 0.071 |
| Year 8*2003 | - | - | - | - | 1.21 (1.01, 1.46) | 0.039 | 1.21 (1.01, 1.45) | 0.041 |
| Year 8*2013 | - | - | - | - | 0.93 (0.78, 1.10) | 0.373 | 0.95 (0.80, 1.12) | 0.527 |
| Year 8*2017 | - | - | - | - | 0.73 (0.63, 0.84) | <0.001 | 0.73 (0.64, 0.85) | <0.001 |
| Year 8*2019 | - | - | - | - | 0.71 (0.62, 0.82) | <0.001 | 0.72 (0.62, 0.83) | <0.001 |
| Year 8*2021 | - | - | - | - | 0.79 (0.69, 0.90) | <0.001 | 0.79 (0.70, 0.91) | 0.001 |
| Year 8*2023 | - | - | - | - | 0.75 (0.66, 0.85) | <0.001 | 0.75 (0.66, 0.86) | <0.001 |
| Year 9*2001 | - | - | - | - | 1.02 (0.85, 1.22) | 0.851 | 1.03 (0.85, 1.23) | 0.789 |
| Year 9*2003 | - | - | - | - | 1.30 (1.08, 1.56) | 0.005 | 1.28 (1.07, 1.54) | 0.007 |
| Year 9*2005 | - | - | - | - | 1.30 (1.09, 1.56) | 0.004 | 1.31 (1.10, 1.57) | 0.003 |
| Year 9*2013 | - | - | - | - | 0.84 (0.71, 1.00) | 0.046 | 0.85 (0.72, 1.01) | 0.059 |
| Year 9*2017 | - | - | - | - | 0.63 (0.55, 0.73) | <0.001 | 0.63 (0.55, 0.73) | <0.001 |
| Year 9*2019 | - | - | - | - | 0.61 (0.53, 0.71) | <0.001 | 0.61 (0.53, 0.70) | <0.001 |
| Year 9*2021 | - | - | - | - | 0.69 (0.61, 0.79) | <0.001 | 0.69 (0.61, 0.79) | <0.001 |
| Year 9*2023 | - | - | - | - | 0.69 (0.61, 0.79) | <0.001 | 0.69 (0.61, 0.78) | <0.001 |
| Year 10*2003 | - | - | - | - | 1.21 (1.01, 1.46) | 0.044 | 1.23 (1.02, 1.48) | 0.030 |
| Year 10*2013 | - | - | - | - | 0.82 (0.69, 0.98) | 0.026 | 0.83 (0.70, 0.98) | 0.033 |
| Year 10*2017 | - | - | - | - | 0.61 (0.53, 0.70) | <0.001 | 0.61 (0.53, 0.71) | <0.001 |
| Year 10*2019 | - | - | - | - | 0.58 (0.50, 0.67) | <0.001 | 0.58 (0.50, 0.67) | <0.001 |
| Year 10*2021 | - | - | - | - | 0.67 (0.59, 0.77) | <0.001 | 0.68 (0.59, 0.77) | <0.001 |
| Year 10*2023 | - | - | - | - | 0.68 (0.60, 0.78) | <0.001 | 0.68 (0.60, 0.78) | <0.001 |
| Year 11*2001 | - | - | - | - | 1.46 (1.21, 1.76) | <0.001 | 1.45 (1.20, 1.75) | <0.001 |
| Year 11*2003 | - | - | - | - | 1.47 (1.22, 1.78) | <0.001 | 1.46 (1.21, 1.76) | <0.001 |
| Year 11*2005 | - | - | - | - | 1.85 (1.54, 2.22) | <0.001 | 1.86 (1.55, 2.24) | <0.001 |
| Year 11*2013 | - | - | - | - | 0.94 (0.79, 1.11) | 0.453 | 0.93 (0.78, 1.10) | 0.403 |
| Year 11*2017 | - | - | - | - | 0.66 (0.57, 0.76) | <0.001 | 0.65 (0.56, 0.75) | <0.001 |
| Year 11*2019 | - | - | - | - | 0.65 (0.56, 0.75) | <0.001 | 0.64 (0.55, 0.74) | <0.001 |
| Year 11*2021 | - | - | - | - | 0.87 (0.76, 0.99) | 0.042 | 0.86 (0.75, 0.98) | 0.027 |
| Year 11*2023 | - | - | - | - | 0.84 (0.73, 0.95) | 0.007 | 0.82 (0.72, 0.94) | 0.004 |
| Lrtest compared to: | Model 2: Chi2 = 1020.13; p<0.001 | | Model 2: Chi2 = 72.71; p<0.001 | | Model 2: Chi2 = 476.73; p<0.001 | | Model 3: Chi2 = 551.56; p<0.001  Model 4: Chi2 = 1498.98; p<0.001  Model 5: Chi2 = 1094.96; p<0.001 | |

| **Student decision making (n=396,472)** | | | | | | | | |
| --- | --- | --- | --- | --- | --- | --- | --- | --- |
|  | Interaction effects: Model 3  [Gender*Survey year] | | Interaction effects: Model 4  [Family affluence*Survey year] | | Interaction effects: Model 5  [Grade*Survey year] | | Interaction effects: Model 6  [Gender*Survey year + Family affluence*Survey year + Grade*Survey year] | |
|  | **OR, 95%CI** | **P value** | **OR, 95%CI** | **P value** | **OR, 95%CI** | **P value** | **OR, 95%CI** | **P value** |
| **2013** | **ref** | **-** | **ref** | **-** | **ref** | **-** | **ref** | **-** |
| 2017 | 0.98 (0.92, 1.04) | 0.475 | 0.96 (0.90, 1.02) | 0.207 | 1.33 (1.22, 1.45) | <0.001 | 1.52 (1.37, 1.70) | <0.001 |
| 2019 | 0.98 (0.93, 1.04) | 0.591 | 0.94 (0.88, 1.00) | 0.048 | 1.33 (1.23, 1.45) | <0.001 | 1.54 (1.38, 1.71) | <0.001 |
| 2021 | 0.93 (0.87, 0.98) | 0.008 | 0.89 (0.84, 0.96) | <0.001 | 1.11 (1.02, 1.21) | <0.001 | 1.32 (1.19, 1.47) | <0.001 |
| 2023 | 0.86 (0.81, 0.91) | <0.001 | 0.78 (0.73, 0.83) | <0.001 | 0.93 (0.86, 1.01) | <0.001 | 1.07 (0.97, 1.19) | 0.187 |
| Girl | 0.97 (0.90, 1.04) | 0.370 | 0.80 (0.79, 0.81) | <0.001 | 0.80 (0.79, 0.81) | <0.001 | 0.97 (0.90, 1.04) | 0.409 |
| Medium FAS | 1.02 (1.01, 1.03) | 0.005 | 1.06 (0.97, 1.16) | 0.190 | 1.02 (1.01, 1.03) | 0.004 | 1.06 (0.97, 1.16) | 0.206 |
| High FAS | 1.01 (1.00, 1.02) | 0.197 | 1.12 (1.03, 1.23) | 0.012 | 1.01 (1.00, 1.02) | 0.177 | 1.12 (1.02, 1.23) | 0.015 |
| Year 8 | 0.48 (0.47, 0.49) | <0.001 | 0.48 (0.47, 0.49) | <0.001 | 0.59 (0.53, 0.66) | <0.001 | 0.60 (0.53, 0.67) | <0.001 |
| Year 9 | 0.29 (0.29, 0.30) | <0.001 | 0.29 (0.29, 0.30) | <0.001 | 0.42 (0.38, 0.47) | <0.001 | 0.42 (0.38, 0.48) | <0.001 |
| Year 10 | 0.20 (0.20, 0.20) | <0.001 | 0.20 (0.20, 0.20) | <0.001 | 0.32 (0.28, 0.36) | <0.001 | 0.32 (0.28, 0.35) | <0.001 |
| Year 11 | 0.17 (0.17, 0.18) | <0.001 | 0.17 (0.17, 0.18) | <0.001 | 0.30 (0.26, 0.34) | <0.001 | 0.30 (0.27, 0.34) | <0.001 |
| Girl*2017 | 0.86 (0.79, 0.93) | <0.001 | - | - | - | - | 0.85 (0.79, 0.92) | <0.001 |
| Girl*2019 | 0.83 (0.77, 0.90) | <0.001 | - | - | - | - | 0.83 (0.77, 0.90) | <0.001 |
| Girl*2021 | 0.82 (0.76, 0.89) | <0.001 | - | - | - | - | 0.82 (0.76, 0.88) | <0.001 |
| Girl*2023 | 0.79 (0.73, 0.85) | <0.001 | - | - | - | - | 0.79 (0.73, 0.85) | <0.001 |
| Medium FAS*2017 | - | - | 0.96 (0.88, 1.06) | 0.436 | - | - | 0.97 (0.88, 1.06) | 0.473 |
| High FAS*2017 | - | - | 0.86 (0.78, 0.95) | 0.002 | - | - | 0.87 (0.79, 0.95) | 0.003 |
| Medium FAS*2019 | - | - | 0.96 (0.87, 1.05) | 0.362 | - | - | 0.96 (0.88, 1.05) | 0.389 |
| High FAS*2019 | - | - | 0.90 (0.82, 0.99) | 0.025 | - | - | 0.90 (0.82, 0.99) | 0.033 |
| Medium FAS*2021 | - | - | 0.94 (0.85, 1.03) | 0.165 | - | - | 0.94 (0.86, 1.03) | 0.177 |
| High FAS*2021 | - | - | 0.86 (0.78, 0.95) | 0.002 | - | - | 0.87 (0.79, 0.95) | 0.003 |
| Medium FAS*2023 | - | - | 0.98 (0.89, 1.07) | 0.614 | - | - | 0.98 (0.89, 1.07) | 0.658 |
| High FAS*2023 | - | - | 0.95 (0.87, 1.04) | 0.296 | - | - | 0.95 (0.87, 1.05) | 0.335 |
| Year 8*2017 | - | - | - | - | 0.76 (0.68, 0.86) | <0.001 | 0.76 (0.67, 0.85) | <0.001 |
| Year 8*2019 | - | - | - | - | 0.77 (0.68, 0.86) | <0.001 | 0.76 (0.68, 0.86) | <0.001 |
| Year 8*2021 | - | - | - | - | 0.86 (0.76, 0.97) | 0.011 | 0.85 (0.76, 0.96) | 0.009 |
| Year 8*2023 | - | - | - | - | 0.82 (0.73, 0.92) | 0.001 | 0.82 (0.72, 0.92) | <0.001 |
| Year 9*2017 | - | - | - | - | 0.62 (0.55, 0.70) | <0.001 | 0.62 (0.55, 0.70) | <0.001 |
| Year 9*2019 | - | - | - | - | 0.62 (0.55, 0.70) | <0.001 | 0.62 (0.55, 0.70) | <0.001 |
| Year 9*2021 | - | - | - | - | 0.74 (0.66, 0.83) | <0.001 | 0.74 (0.65, 0.83) | <0.001 |
| Year 9*2023 | - | - | - | - | 0.76 (0.67, 0.85) | <0.001 | 0.75 (0.67, 0.85) | <0.001 |
| Year 10*2017 | - | - | - | - | 0.57 (0.51, 0.65) | <0.001 | 0.58 (0.51, 0.65) | <0.001 |
| Year 10*2019 | - | - | - | - | 0.55 (0.48, 0.62) | <0.001 | 0.55 (0.49, 0.62) | <0.001 |
| Year 10*2021 | - | - | - | - | 0.64 (0.57, 0.72) | <0.001 | 0.65 (0.57, 0.73) | <0.001 |
| Year 10*2023 | - | - | - | - | 0.75 (0.67, 0.85) | <0.001 | 0.75 (0.67, 0.85) | <0.001 |
| Year 11*2017 | - | - | - | - | 0.51 (0.45, 0.58) | <0.001 | 0.51 (0.45, 0.58) | <0.001 |
| Year 11*2019 | - | - | - | - | 0.49 (0.43, 0.55) | <0.001 | 0.48 (0.43, 0.55) | <0.001 |
| Year 11*2021 | - | - | - | - | 0.56 (0.49, 0.63) | <0.001 | 0.55 (0.49, 0.63) | <0.001 |
| Year 11*2023 | - | - | - | - | 0.77 (0.68, 0.87) | <0.001 | 0.77 (0.68, 0.87) | <0.001 |
| Lrtest compared to: | Model 2: Chi2 = 51.49; p<0.001 | | Model 2: Chi2 = 45.55; p<0.001 | | Model 2: Chi2 = 702.34; p<0.001 | | Model 3: Chi2 = 748.51; p<0.001  Model 4: Chi2 = 754.45; p<0.001  Model 5: Chi2 = 97.66; p<0.001 | |

| **Liking school (n=184,852)** | | | | | | | | |
| --- | --- | --- | --- | --- | --- | --- | --- | --- |
|  | Interaction effects: Model 3  [Gender*Survey year] | | Interaction effects: Model 4  [Family affluence*Survey year] | | Interaction effects: Model 5  [Grade*Survey year] | | Interaction effects: Model 6  [Gender*Survey year + Family affluence*Survey year + Grade*Survey year] | |
|  | **OR (95%CI)** | **P-value** | **OR (95%CI)** | **P-value** | **OR (95%CI)** | **P-value** | **OR (95%CI)** | **P-value** |
| 2001 | 0.78 (0.68, 0.89) | <0.001 | 0.76 (0.65, 0.90) | 0.001 | 0.50 (0.39, 0.64) | <0.001 | 0.55 (0.41, 0.74) | <0.001 |
| 2003 | 0.75 (0.67, 0.84) | <0.001 | 0.69 (0.60, 0.80) | <0.001 | 0.46 (0.36, 0.59) | <0.001 | 0.41 (0.31, 0.55) | <0.001 |
| 2005 | 0.64 (0.56, 0.73) | <0.001 | 0.62 (0.53, 0.73) | <0.001 | 0.34 (0.27, 0.43) | <0.001 | 0.30 (0.23, 0.39) | <0.001 |
| **2009** | **ref** | **-** | **ref** | **-** | **ref** | **-** | **ref** | **-** |
| 2013 | 0.96 (0.86, 1.07) | 0.472 | 0.92 (0.81, 1.04) | 0.197 | 0.77 (0.60, 0.98) | 0.032 | 0.92 (0.70, 1.20) | 0.524 |
| 2017 | 0.50 (0.46, 0.55) | <0.001 | 0.48 (0.43, 0.53) | <0.001 | 0.40 (0.33, 0.49) | <0.001 | 0.45 (0.36, 0.56) | <0.001 |
| 2019 | 0.51 (0.46, 0.56) | <0.001 | 0.43 (0.38, 0.47) | <0.001 | 0.38 (0.31, 0.47) | <0.001 | 0.44 (0.35, 0.55) | <0.001 |
| 2021 | 0.53 (0.48, 0.58) | <0.001 | 0.40 (0.36, 0.44) | <0.001 | 0.34 (0.28, 0.41) | <0.001 | 0.44 (0.36, 0.55) | <0.001 |
| 2023 | 0.39 (0.36, 0.43) | <0.001 | 0.28 (0.25, 0.31) | <0.001 | 0.19 (0.16, 0.24) | <0.001 | 0.28 (0.22, 0.34) | <0.001 |
| Girl | 1.11 (1.00, 1.24) | 0.058 | 0.75 (0.74, 0.77) | <0.001 | 0.75 (0.74, 0.77) | <0.001 | 1.11 (1.00, 1.24) | 0.055 |
| Medium FAS | 1.15 (1.13, 1.18) | <0.001 | 1.16 (1.02, 1.30) | 0.019 | 1.15 (1.13, 1.18) | <0.001 | 1.17 (1.03, 1.32) | 0.012 |
| High FAS | 1.31 (1.28, 1.35) | <0.001 | 1.30 (1.12, 1.51) | <0.001 | 1.31 (1.28, 1.35) | <0.001 | 1.31 (1.13, 1.52) | <0.001 |
| Year 8 | 0.44 (0.42, 0.45) | <0.001 | 0.44 (0.43, 0.46) | <0.001 | 0.31 (0.25, 0.39) | <0.001 | 0.31 (0.25, 0.38) | <0.001 |
| Year 9 | 0.36 (0.35, 0.37) | <0.001 | 0.36 (0.35, 0.38) | <0.001 | 0.28 (0.22, 0.35) | <0.001 | 0.28 (0.23, 0.35) | <0.001 |
| Year 10 | 0.29 (0.28, 0.30) | <0.001 | 0.29 (0.28, 0.30) | <0.001 | 0.25 (0.20, 0.31) | <0.001 | 0.25 (0.20, 0.31) | <0.001 |
| Year 11 | 0.25 (0.24, 0.26) | <0.001 | 0.25 (0.24, 0.26) | <0.001 | 0.20 (0.16, 0.25) | <0.001 | 0.20 (0.16, 0.25) | <0.001 |
| Girl*2001 | 0.90 (0.75, 1.08) | 0.268 | - | - | - | - | 0.89 (0.74, 1.07) | 0.230 |
| Girl*2003 | 1.02 (0.87, 1.19) | 0.796 | - | - | - | - | 1.03 (0.88, 1.20) | 0.728 |
| Girl*2005 | 1.10 (0.92, 1.31) | 0.281 | - | - | - | - | 1.11 (0.93, 1.32) | 0.253 |
| Girl*2013 | 0.81 (0.70, 0.94) | 0.005 | - | - | - | - | 0.81 (0.70, 0.94) | 0.005 |
| Girl*2017 | 0.86 (0.76, 0.97) | 0.013 | - | - | - | - | 0.86 (0.76, 0.97) | 0.012 |
| Girl*2019 | 0.75 (0.67, 0.85) | <0.001 | - | - | - | - | 0.75 (0.67, 0.85) | <0.001 |
| Girl*2021 | 0.60 (0.54, 0.67) | <0.001 | - | - | - | - | 0.60 (0.53, 0.67) | <0.001 |
| Girl*2023 | 0.52 (0.46, 0.59) | <0.001 | - | - | - | - | 0.53 (0.47, 0.59) | <0.001 |
| Medium FAS*2001 | - | - | 1.00 (0.81, 1.24) | 0.981 | - | - | 1.00 (0.81, 1.23) | 0.986 |
| High FAS*2001 |  |  | 0.87 (0.67, 1.11) | 0.260 |  |  | 0.89 (0.70, 1.15) | 0.382 |
| Medium FAS*2003 | - | - | 1.11 (0.93, 1.33) | 0.239 | - | - | 1.13 (0.95, 1.36) | 0.171 |
| High FAS*2003 |  |  | 1.15 (0.93, 1.41) | 0.205 |  |  | 1.18 (0.96, 1.46) | 0.120 |
| Medium FAS*2005 | - | - | 1.13 (0.92, 1.39) | 0.239 | - | - | 1.14 (0.93, 1.40) | 0.215 |
| High FAS*2005 |  |  | 1.08 (0.86, 1.37) | 0.498 |  |  | 1.11 (0.88, 1.41) | 0.358 |
| Medium FAS*2013 | - | - | 0.88 (0.75, 1.04) | 0.145 | - | - | 0.88 (0.74, 1.04) | 0.129 |
| High FAS*2013 |  |  | 0.91 (0.75, 1.10) | 0.311 |  |  | 0.90 (0.75, 1.10) | 0.310 |
| Medium FAS*2017 | - | - | 0.98 (0.86, 1.12) | 0.781 | - | - | 0.98 (0.85, 1.12) | 0.717 |
| High FAS*2017 |  |  | 0.93 (0.79, 1.10) | 0.391 |  |  | 0.93 (0.79, 1.09) | 0.376 |
| Medium FAS*2019 | - | - | 1.04 (0.91, 1.19) | 0.587 | - | - | 1.03 (0.90, 1.18) | 0.667 |
| High FAS*2019 |  |  | 1.02 (0.86, 1.20) | 0.837 |  |  | 1.02 (0.86, 1.20) | 0.845 |
| Medium FAS*2021 | - | - | 1.00 (0.88, 1.13) | 0.995 | - | - | 0.99 (0.87, 1.12) | 0.874 |
| High FAS*2021 |  |  | 1.03 (0.88, 1.20) | 0.739 |  |  | 1.02 (0.88, 1.19) | 0.762 |
| Medium FAS*2023 | - | - | 0.97 (0.85, 1.11) | 0.647 | - | - | 0.95 (0.83, 1.09) | 0.495 |
| High FAS*2023 |  |  | 1.04 (0.89, 1.23) | 0.607 |  |  | 1.03 (0.88, 1.21) | 0.702 |
| Year 8*2003 | - | - | - | - | 1.93 (1.43, 2.59) | <0.001 | 1.92 (1.43, 2.58) | <0.001 |
| Year 8*2013 | - | - | - | - | 1.38 (1.04, 1.84) | 0.026 | 1.40 (1.05, 1.86) | 0.021 |
| Year 8*2017 | - | - | - | - | 1.38 (1.09, 1.75) | 0.008 | 1.39 (1.10, 1.76) | 0.007 |
| Year 8*2019 | - | - | - | - | 1.33 (1.05, 1.68) | 0.019 | 1.34 (1.05, 1.69) | 0.016 |
| Year 8*2021 | - | - | - | - | 1.38 (1.10, 1.73) | 0.005 | 1.38 (1.10, 1.72) | 0.005 |
| Year 8*2023 | - | - | - | - | 1.49 (1.18, 1.88) | 0.001 | 1.48 (1.17, 1.87) | 0.001 |
| Year 9*2001 | - | - | - | - | 1.60 (1.19, 2.15) | 0.002 | 1.61 (1.20, 2.16) | 0.002 |
| Year 9*2003 | - | - | - | - | 1.77 (1.32, 2.37) | <0.001 | 1.76 (1.31, 2.36) | <0.001 |
| Year 9*2005 | - | - | - | - | 2.06 (1.56, 2.72) | <0.001 | 2.07 (1.57, 2.73) | <0.001 |
| Year 9*2013 | - | - | - | - | 1.18 (0.89, 1.57) | 0.244 | 1.19 (0.90, 1.58) | 0.220 |
| Year 9*2017 | - | - | - | - | 1.21 (0.96, 1.53) | 0.111 | 1.22 (0.96, 1.54) | 0.103 |
| Year 9*2019 | - | - | - | - | 1.12 (0.89, 1.42) | 0.326 | 1.12 (0.89, 1.42) | 0.334 |
| Year 9*2021 | - | - | - | - | 1.26 (1.01, 1.58) | 0.040 | 1.25 (1.00, 1.56) | 0.049 |
| Year 9*2023 | - | - | - | - | 1.48 (1.17, 1.86) | 0.001 | 1.45 (1.15, 1.83) | 0.002 |
| Year 10*2003 | - | - | - | - | 1.59 (1.18, 2.13) | 0.002 | 1.61 (1.20, 2.16) | 0.001 |
| Year 10*2013 | - | - | - | - | 0.97 (0.73, 1.29) | 0.858 | 0.99 (0.74, 1.31) | 0.921 |
| Year 10*2017 | - | - | - | - | 1.04 (0.82, 1.31) | 0.775 | 1.04 (0.82, 1.32) | 0.723 |
| Year 10*2019 | - | - | - | - | 1.06 (0.84, 1.35) | 0.607 | 1.07 (0.84, 1.36) | 0.573 |
| Year 10*2021 | - | - | - | - | 1.12 (0.89, 1.40) | 0.338 | 1.11 (0.89, 1.39) | 0.355 |
| Year 10*2023 | - | - | - | - | 1.40 (1.11, 1.76) | 0.005 | 1.38 (1.09, 1.74) | 0.007 |
| Year 11*2001 | - | - | - | - | 1.53 (1.14, 2.05) | 0.005 | 1.52 (1.13, 2.04) | 0.005 |
| Year 11*2003 | - | - | - | - | 1.66 (1.24, 2.23) | <0.001 | 1.65 (1.23, 2.21) | 0.001 |
| Year 11*2005 | - | - | - | - | 2.58 (1.95, 3.41) | <0.001 | 2.59 (1.96, 3.42) | <0.001 |
| Year 11*2013 | - | - | - | - | 1.03 (0.78, 1.37) | 0.837 | 1.03 (0.78, 1.37) | 0.826 |
| Year 11*2017 | - | - | - | - | 1.05 (0.83, 1.33) | 0.702 | 1.05 (0.83, 1.33) | 0.707 |
| Year 11*2019 | - | - | - | - | 1.07 (0.85, 1.36) | 0.549 | 1.07 (0.85, 1.36) | 0.549 |
| Year 11*2021 | - | - | - | - | 1.13 (0.90, 1.41) | 0.283 | 1.11 (0.89, 1.39) | 0.354 |
| Year 11*2023 | - | - | - | - | 1.88 (1.49, 2.37) | <0.001 | 1.84 (1.46, 2.32) | <0.001 |
| Lrtest compared to: | Model 2: Chi2 = 433.57; p<0.001 | | Model 2: Chi2 = 26.62; p=0.0460 | | Model 2: Chi2 = 272.91; p<0.001 | | Model 3: Chi2 = 296.67; p<0.001  Model 4: Chi2 = 703.62; p<0.001  Model 5: Chi2 = 457.33; p<0.001 | |

| **School belonging (n=355,140)** | | | | | | | | |
| --- | --- | --- | --- | --- | --- | --- | --- | --- |
|  | Interaction effects: Model 3  [Gender*Survey year] | | Interaction effects: Model 4  [Family affluence*Survey year] | | Interaction effects: Model 5  [Grade*Survey year] | | Interaction effects: Model 6  [Gender*Survey year + Family affluence*Survey year + Grade*Survey year] | |
|  | **OR (95%CI)** | **P-value** | **OR (95%CI)** | **P-value** | **OR (95%CI)** | **P-value** | **OR (95%CI)** | **P-value** |
| 2001 | 1.05 (0.93, 1.18) | 0.414 | 1.12 (0.98, 1.29) | 0.103 | 0.72 (0.62, 0.83) | <0.001 | 0.67 (0.55, 0.81) | <0.001 |
| 2003 | 0.94 (0.85, 1.03) | 0.193 | 1.07 (0.95, 1.21) | 0.250 | 0.62 (0.54, 0.71) | <0.001 | 0.56 (0.47, 0.66) | <0.001 |
| **2017** | **ref** | **-** | **ref** | **-** | **ref** | **-** | **ref** | **-** |
| 2019 | 1.12 (1.09, 1.15) | <0.001 | 1.00 (0.97, 1.04) | 0.863 | 1.00 (0.95, 1.04) | 0.863 | 1.05 (0.99, 1.11) | 0.126 |
| 2021 | 1.11 (1.07, 1.15) | <0.001 | 0.90 (0.86, 0.93) | <0.001 | 0.79 (0.74, 0.83) | <0.001 | 0.98 (0.92, 1.06) | 0.670 |
| 2023 | 0.89 (0.87, 0.92) | <0.001 | 0.65 (0.63, 0.67) | <0.001 | 0.62 (0.59, 0.65) | <0.001 | 0.75 (0.71, 0.80) | <0.001 |
| Girl | 0.82 (0.80, 0.85) | <0.001 | 0.65 (0.64, 0.66) | <0.001 | 0.65 (0.64, 0.66) | <0.001 | 0.82 (0.80, 0.85) | <0.001 |
| Medium FAS | 1.23 (1.20, 1.25) | <0.001 | 1.21 (1.17, 1.25) | <0.001 | 1.22 (1.20, 1.25) | <0.001 | 1.21 (1.17, 1.25) | <0.001 |
| High FAS | 1.39 (1.37, 1.42) | <0.001 | 1.28 (1.24, 1.33) | <0.001 | 1.39 (1.36, 1.41) | <0.001 | 1.29 (1.24, 1.33) | <0.001 |
| Year 8 | 0.55 (0.53, 0.56) | <0.001 | 0.55 (0.54, 0.56) | <0.001 | 0.51 (0.48, 0.53) | <0.001 | 0.51 (0.49, 0.53) | <0.001 |
| Year 9 | 0.41 (0.40, 0.42) | <0.001 | 0.41 (0.40, 0.42) | <0.001 | 0.38 (0.36, 0.39) | <0.001 | 0.38 (0.36, 0.40) | <0.001 |
| Year 10 | 0.33 (0.32, 0.34) | <0.001 | 0.33 (0.32, 0.34) | <0.001 | 0.30 (0.29, 0.31) | <0.001 | 0.30 (0.29, 0.32) | <0.001 |
| Year 11 | 0.30 (0.30, 0.31) | <0.001 | 0.31 (0.30, 0.31) | <0.001 | 0.26 (0.25, 0.28) | <0.001 | 0.27 (0.25, 0.28) | <0.001 |
| Girl*2001 | 1.15 (0.99, 1.32) | 0.064 | - | - | - | - | 1.15 (1.00, 1.33) | 0.055 |
| Girl*2003 | 1.23 (1.10, 1.37) | <0.001 | - | - | - | - | 1.23 (1.10, 1.37) | <0.001 |
| Girl * 2019 | 0.87 (0.83, 0.90) | <0.001 | - | - | - | - | 0.87 (0.83, 0.90) | <0.001 |
| Girl * 2021 | 0.66 (0.63, 0.69) | <0.001 | - | - | - | - | 0.66 (0.63, 0.70) | <0.001 |
| Girl * 2023 | 0.62 (0.60, 0.65) | <0.001 | - | - | - | - | 0.62 (0.60, 0.65) | <0.001 |
| Medium FAS*2001 | - | - | 1.02 (0.86, 1.21) | 0.803 | - | - | 1.02 (0.87, 1.20) | 0.804 |
| High FAS*2001 |  |  | 0.93 (0.77, 1.12) | 0.441 |  |  | 0.98 (0.81, 1.18) | 0.841 |
| Medium FAS*2003 | - | - | 0.93 (0.82, 1.07) | 0.314 | - | - | 0.96 (0.84, 1.09) | 0.520 |
| High FAS*2003 |  |  | 1.01 (0.87, 1.16) | 0.925 |  |  | 1.06 (0.92, 1.22) | 0.427 |
| Medium FAS*2019 | - | - | 1.01 (0.97, 1.06) | 0.611 | - | - | 1.01 (0.96, 1.06) | 0.659 |
| High FAS*2019 |  |  | 1.09 (1.04, 1.14) | <0.001 |  |  | 1.09 (1.04, 1.14) | <0.001 |
| Medium FAS*2021 | - | - | 0.96 (0.91, 1.02) | 0.158 | - | - | 0.96 (0.90, 1.01) | 0.115 |
| High FAS*2021 |  |  | 1.06 (1.00, 1.12) | 0.055 |  |  | 1.06 (1.00, 1.12) | 0.065 |
| Medium FAS*2023 | - | - | 1.05 (1.01, 1.10) | 0.025 | - | - | 1.05 (1.00, 1.10) | 0.036 |
| High FAS*2023 |  |  | 1.16 (1.11, 1.21) | <0.001 |  |  | 1.16 (1.11, 1.21) | <0.001 |
| Year 8*2003 | - | - | - | - | 1.69 (1.42, 2.02) | <0.001 | 1.67 (1.40, 1.99) | <0.001 |
| Year 8*2019 | - | - | - | - | 1.07 (1.01, 1.14) | 0.031 | 1.07 (1.00, 1.14) | 0.043 |
| Year 8*2021 | - | - | - | - | 1.17 (1.09, 1.27) | <0.001 | 1.16 (1.08, 1.25) | <0.001 |
| Year 8*2023 | - | - | - | - | 1.06 (1.00, 1.13) | 0.053 | 1.04 (0.98, 1.11) | 0.186 |
| Year 9*2001 | - | - | - | - | 1.63 (1.37, 1.95) | <0.001 | 1.64 (1.37, 1.95) | <0.001 |
| Year 9*2003 | - | - | - | - | 1.75 (1.47, 2.08) | <0.001 | 1.73 (1.46, 2.05) | <0.001 |
| Year 9*2019 | - | - | - | - | 1.06 (1.00, 1.13) | 0.071 | 1.05 (0.99, 1.12) | 0.119 |
| Year 9*2021 | - | - | - | - | 1.22 (1.13, 1.31) | <0.001 | 1.20 (1.11, 1.29) | <0.001 |
| Year 9*2023 | - | - | - | - | 1.09 (1.03, 1.16) | 0.005 | 1.06 (1.00, 1.12) | 0.065 |
| Year 10*2003 | - | - | - | - | 1.81 (1.52, 2.15) | <0.001 | 1.81 (1.52, 2.16) | <0.001 |
| Year 10*2019 | - | - | - | - | 1.01 (0.95, 1.08) | 0.752 | 1.00 (0.94, 1.07) | 0.914 |
| Year 10*2021 | - | - | - | - | 1.17 (1.08, 1.26) | <0.001 | 1.14 (1.06, 1.23) | <0.001 |
| Year 10*2023 | - | - | - | - | 1.19 (1.11, 1.26) | <0.001 | 1.15 (1.08, 1.22) | <0.001 |
| Year 11*2001 | - | - | - | - | 2.10 (1.75, 2.52) | <0.001 | 2.09 (1.75, 2.51) | <0.001 |
| Year 11*2003 | - | - | - | - | 2.30 (1.93, 2.75) | <0.001 | 2.29 (1.92, 2.73) | <0.001 |
| Year 11*2019 | - | - | - | - | 1.05 (0.99, 1.12) | 0.113 | 1.05 (0.98, 1.12) | 0.171 |
| Year 11*2021 | - | - | - | - | 1.12 (1.04, 1.21) | 0.004 | 1.10 (1.02, 1.19) | 0.017 |
| Year 11*2023 | - | - | - | - | 1.35 (1.27, 1.43) | <0.001 | 1.31 (1.23, 1.39) | <0.001 |
| Lrtest compared to: | Model 2: Chi2 = 856.13; p<0.001 | | Model 2: Chi2 = 56.01; p<0.001 | | Model 2: Chi2 = 306.73; p<0.001 | | Model 3: Chi2 = 346.79; p<0.001  Model 4: Chi2 = 1146.91; p<0.001  Model 5: Chi2 = 896.19; p<0.001 | |

| **Adult to confide in (n=351,737)** | | | | | | | | |
| --- | --- | --- | --- | --- | --- | --- | --- | --- |
|  | Interaction effects: Model 3  [Gender*Survey year] | | Interaction effects: Model 4  [Family affluence*Survey year] | | Interaction effects: Model 5  [Grade*Survey year] | | Interaction effects: Model 6  [Gender*Survey year + Family affluence*Survey year + Grade*Survey year] | |
|  | **OR (95%CI)** | **P-value** | **OR (95%CI)** | **P-value** | **OR (95%CI)** | **P-value** | **OR (95%CI)** | **P-value** |
| **2017** | **ref** | **-** | **ref** | **-** | **ref** | **-** | **ref** | **-** |
| 2019 | 1.14 (1.11, 1.17) | <0.001 | 1.11 (1.07, 1.15) | <0.001 | 1.10 (1.04, 1.15) | <0.001 | 1.14 (1.07, 1.21) | <0.001 |
| 2021 | 0.93 (0.89, 0.96) | <0.001 | 0.89 (0.85, 0.93) | <0.001 | 0.73 (0.69, 0.78) | <0.001 | 0.77 (0.72, 0.83) | <0.001 |
| 2023 | 0.94 (0.91, 0.96) | <0.001 | 0.85 (0.83, 0.88) | <0.001 | 0.77 (0.74, 0.81) | <0.001 | 0.81 (0.76, 0.85) | <0.001 |
| Girl | 1.16 (1.13, 1.20) | <0.001 | 1.08 (1.06, 1.09) | <0.001 | 1.08 (1.06, 1.09) | <0.001 | 1.16 (1.13, 1.20) | <0.001 |
| Medium FAS | 1.10 (1.08, 1.12) | <0.001 | 1.12 (1.08, 1.16) | <0.001 | 1.10 (1.08, 1.12) | <0.001 | 1.12 (1.08, 1.16) | <0.001 |
| High FAS | 1.15 (1.13, 1.17) | <0.001 | 1.11 (1.08, 1.15) | <0.001 | 1.15 (1.13, 1.17) | <0.001 | 1.12 (1.08, 1.16) | <0.001 |
| Year 8 | 0.63 (0.62, 0.65) | <0.001 | 0.63 (0.62, 0.65) | <0.001 | 0.59 (0.56, 0.62) | <0.001 | 0.59 (0.56, 0.62) | <0.001 |
| Year 9 | 0.49 (0.48, 0.50) | <0.001 | 0.49 (0.48, 0.50) | <0.001 | 0.45 (0.43, 0.48) | <0.001 | 0.45 (0.43, 0.48) | <0.001 |
| Year 10 | 0.44 (0.43, 0.45) | <0.001 | 0.44 (0.43, 0.45) | <0.001 | 0.40 (0.38, 0.42) | <0.001 | 0.40 (0.38, 0.42) | <0.001 |
| Year 11 | 0.51 (0.49, 0.52) | <0.001 | 0.51 (0.49, 0.52) | <0.001 | 0.45 (0.43, 0.47) | <0.001 | 0.45 (0.43, 0.47) | <0.001 |
| Girl * 2019 | 0.94 (0.90, 0.98) | 0.002 | - | - | - | - | 0.94 (0.90, 0.98) | 0.002 |
| Girl * 2021 | 0.91 (0.87, 0.96) | <0.001 | - | - | - | - | 0.91 (0.87, 0.96) | <0.001 |
| Girl * 2023 | 0.88 (0.84, 0.91) | <0.001 | - | - | - | - | 0.88 (0.84, 0.91) | <0.001 |
| Medium FAS*2019 | - | - | 0.96 (0.92, 1.01) | 0.131 | - | - | 0.96 (0.92, 1.01) | 0.125 |
| High FAS*2019 |  |  | 1.01 (0.97, 1.06) | 0.579 |  |  | 1.01 (0.97, 1.06) | 0.578 |
| Medium FAS*2021 | - | - | 0.98 (0.92, 1.03) | 0.414 | - | - | 0.97 (0.92, 1.03) | 0.313 |
| High FAS*2021 |  |  | 1.02 (0.96, 1.08) | 0.618 |  |  | 1.01 (0.95, 1.07) | 0.813 |
| Medium FAS*2023 | - | - | 1.00 (0.96, 1.05) | 0.845 | - | - | 1.00 (0.96, 1.05) | 0.920 |
| High FAS*2023 |  |  | 1.07 (1.02, 1.12) | 0.003 |  |  | 1.07 (1.02, 1.12) | 0.004 |
| Year 8*2019 | - | - | - | - | 1.04 (0.97, 1.11) | 0.308 | 1.04 (0.97, 1.11) | 0.301 |
| Year 8*2021 | - | - | - | - | 1.19 (1.10, 1.28) | <0.001 | 1.19 (1.10, 1.28) | <0.001 |
| Year 8*2023 | - | - | - | - | 1.10 (1.04, 1.18) | 0.002 | 1.10 (1.04, 1.18) | 0.002 |
| Year 9*2019 | - | - | - | - | 1.01 (0.95, 1.08) | 0.701 | 1.01 (0.95, 1.08) | 0.696 |
| Year 9*2021 | - | - | - | - | 1.24 (1.15, 1.34) | <0.001 | 1.25 (1.15, 1.34) | <0.001 |
| Year 9*2023 | - | - | - | - | 1.10 (1.03, 1.17) | 0.004 | 1.10 (1.03, 1.17) | 0.004 |
| Year 10*2019 | - | - | - | - | 0.99 (0.93, 1.06) | 0.737 | 0.99 (0.93, 1.06) | 0.759 |
| Year 10*2021 | - | - | - | - | 1.25 (1.16, 1.35) | <0.001 | 1.25 (1.16, 1.35) | <0.001 |
| Year 10*2023 | - | - | - | - | 1.19 (1.12, 1.27) | <0.001 | 1.19 (1.12, 1.27) | <0.001 |
| Year 11*2019 | - | - | - | - | 0.99 (0.92, 1.06) | 0.674 | 0.99 (0.92, 1.06) | 0.703 |
| Year 11*2021 | - | - | - | - | 1.33 (1.23, 1.44) | <0.001 | 1.34 (1.23, 1.45) | <0.001 |
| Year 11*2023 | - | - | - | - | 1.27 (1.19, 1.36) | <0.001 | 1.28 (1.19, 1.36) | <0.001 |
| Lrtest compared to: | Model 2: Chi2 = 46.17; p<0.001 |  | Model 2: Chi2 = 15.32; p=0.0179 |  | Model 2: Chi2 = 147.63; p<0.001 |  | Model 3: Chi2 = 163.49; p<0.001  Model 4: Chi2 = 194.34; p<0.001  Model 5: Chi2 = 62.03; p<0.001 |  |
