# Supplementary material for: Trends in student perceptions of school connectedness from 2001 to 2024: Context before and immediately after the implementation of the Whole School Approach to emotional and mental wellbeing in Wales
Source: Research Square preprint supplement (doi:10.21203/rs.3.rs-8659762/v1), 2026-01-30
Supplement: Supplementary file 4 [file 90198289d11cf427cccdc4c3.docx]

**APPENDIX 6: INTERACTION EFFECTS - LINCOM STATISTICS AND MARGINS PLOTS FOR SECONDARY SCHOOL DATA**

1A-F: Gender effects for each outcome

2A-F: Age effects for each outcome

3A-F: Family affluence effects for each outcome

****Due to the complexity of the interactions, lincom and marginsplots have been run on the models with a single interaction rather than the full model with three survey year interactions. These have been checked against the marginsplots produced from the full model and there is no difference in the outputs. Lincom commands do not produce accurate estimates from the full model as the reference value is not meaningful.**

**1A. GENDER EFFECTS: STAFF-STUDENT RELATIONSHIPS**

Effect of gender within each survey year

| **Subgroup of students:** | **2013 survey** | **2017 survey** | **2019 survey** | **2021 survey** | **2023 survey** |
| --- | --- | --- | --- | --- | --- |
| **Predictor:** | *Girl* | *Girl* | *Girl* | *Girl* | *Girl* |
| **Reference category** | *Boy* | *Boy* | *Boy* | *Boy* | *Boy* |
| Staff-student relationships  (OR 95%CI) | 0.91 (0.84, 0.98), p=0.011 | 0.79 (0.76, 0.83), p<0.001 | 0.73 (0.70, 0.77), p<0.001 | 0.59 (0.57, 0.61), p<0.001 | 0.56 (0.55, 0.57), p<0.001 |

Effect of survey year within each gender

| Staff-student relationships (OR 95%CI) | | | | |
| --- | --- | --- | --- | --- |
| **Predictor:** | ***2017***  ***survey*** | ***2019***  ***survey*** | ***2021***  ***survey*** | ***2023***  ***survey*** |
| **Reference category** | *2013 survey* | *2013 survey* | *2013 survey* | *2013 survey* |
| **Subgroup of students: Boys** | 1.06 (0.99, 1.13), p=0.083 | 1.23 (1.15, 1.31), p<0.001 | 1.08 (1.01, 1.15), p=0.015 | 0.97 (0.92, 1.03), p=0.330 |
| **Subgroup of students: Girls** | 0.93 (0.87, 0.99), p=0.021 | 0.99 (0.93, 1.06), p=0.836 | 0.70 (0.66, 0.75), p<0.001 | 0.60 (0.57, 0.63), p<0.001 |

*N.B ordinal outcome modelled as continuous for graph only to aid interpretation*

**1B. GENDER EFFECTS: STUDENT RELATIONSHIPS**

Effect of gender within each survey year

| **Subgroup of students:** | **2001**  **survey** | **2003**  **survey** | **2005**  **survey** | **2009**  **survey** | **2013**  **survey** | **2017**  **survey** | **2019**  **survey** | **2021**  **survey** | **2023**  **survey** |
| --- | --- | --- | --- | --- | --- | --- | --- | --- | --- |
| **Predictor:** | *Girl* | *Girl* | *Girl* | *Girl* | *Girl* | *Girl* | *Girl* | *Girl* | *Girl* |
| **Reference category** | *Boy* | *Boy* | *Boy* | *Boy* | *Boy* | *Boy* | *Boy* | *Boy* | *Boy* |
| Student relationships (OR 95%CI) | 0.88 (0.79, 0.98), p=0.026 | 0.96 (0.88, 1.04), p=0.313 | 0.97 (0.87, 1.08), p=0.547 | 1.01 (0.94, 1.10), p=0.723 | 0.85 (0.79, 0.91), p<0.001 | 0.68 (0.65, 0.71), p<0.001 | 0.60 (0.58, 0.63), p<0.001 | 0.57 (0.55, 0.59), p<0.001 | 0.47 (0.46, 0.48), p<0.001 |

Effect of survey year within gender

| Student relationships (OR 95%CI) | | | | | | | | |
| --- | --- | --- | --- | --- | --- | --- | --- | --- |
| **Predictor:** | ***2001***  ***survey*** | ***2003***  ***survey*** | ***2005***  ***survey*** | ***2013***  ***survey*** | ***2017***  ***survey*** | ***2019***  ***survey*** | ***2021***  ***survey*** | ***2023***  ***survey*** |
| **Reference category** | *2009 survey* | *2009 survey* | *2009 survey* | *2009 survey* | *2009 survey* | *2009 survey* | *2009 survey* | *2009 survey* |
| Subgroup of students: Boys | 0.89 (0.81, 0.98), p=0.024 | 0.89 (0.81, 0.97), p=0.008 | 0.70 (0.63, 0.77), p<0.001 | 0.76 (0.70, 0.83), p<0.001 | 0.64 (0.60, 0.69), p<0.001 | 0.72 (0.67, 0.77), p<0.001 | 0.61 (0.57, 0.66), p<0.001 | 0.53 (0.49, 0.57), p<0.001 |
| Subgroup of students: Girls | 0.77 (0.70, 0.86), p<0.001 | 0.84 (0.77, 0.91), p<0.001 | 0.66 (0.60, 0.73), p<0.001 | 0.64 (0.59, 0.69), p<0.001 | 0.43 (0.40, 0.46), p<0.001 | 0.43 (0.40, 0.46), p<0.001 | 0.35 (0.32, 0.37), p<0.001 | 0.24 (0.23, 0.26), p<0.001 |

**1C. GENDER EFFECTS: STUDENT DECISION-MAKING**

Effect of gender within each survey year

| **Subgroup of students:** | **2013 survey** | **2017 survey** | **2019 survey** | **2021 survey** | **2023 survey** |
| --- | --- | --- | --- | --- | --- |
| **Predictor:** | *Girl* | *Girl* | *Girl* | *Girl* | *Girl* |
| **Reference category** | *Boy* | *Boy* | *Boy* | *Boy* | *Boy* |
| Student decision making (OR 95%CI) | 0.97 (0.90, 1.04), p=0.370 | 0.83 (0.81, 0.85), p<0.001 | 0.80 (0.79, 0.82), p<0.001 | 0.79 (0.77, 0.81), p<0.001 | 0.76 (0.75, 0.78), p<0.001 |

Effect of survey year within each gender

| Student decision-making (OR 95%CI) | | | | |
| --- | --- | --- | --- | --- |
| **Predictor:** | ***2017***  ***survey*** | ***2019***  ***survey*** | ***2021***  ***survey*** | ***2023***  ***survey*** |
| **Reference category** | *2013 survey* | *2013 survey* | *2013 survey* | *2013 survey* |
| **Subgroup of students: Boys** | 0.98 (0.92, 1.04), p=0.475 | 0.98 (0.93, 1.04), p=0.591 | 0.93 (0.87, 0.98), p=0.008 | 0.86 (0.81, 0.91), p<0.001 |
| **Subgroup of students: Girls** | 0.84 (0.79, 0.89), p<0.001 | 0.82 (0.77, 0.86), p<0.001 | 0.76 (0.72, 0.80), p<0.001 | 0.68 (0.64, 0.72), p<0.001 |

*N.B ordinal outcome modelled as continuous for graph only to aid interpretation*

**1D. GENDER EFFECTS: LIKE SCHOOL**

Effect of gender within each survey year

| **Subgroup of students:** | **2001**  **survey** | **2003**  **survey** | **2005**  **survey** | **2009**  **survey** | **2013**  **survey** | **2017**  **survey** | **2019**  **survey** | **2021**  **survey** | **2023**  **survey** |
| --- | --- | --- | --- | --- | --- | --- | --- | --- | --- |
| **Predictor:** | *Girl* | *Girl* | *Girl* | *Girl* | *Girl* | *Girl* | *Girl* | *Girl* | *Girl* |
| **Reference category** | *Boy* | *Boy* | *Boy* | *Boy* | *Boy* | *Boy* | *Boy* | *Boy* | *Boy* |
| Like school (OR 95%CI) | 1.00 (0.86, 1.16), p=0.993 | 1.13 (1.01, 1.27), p=0.029 | 1.22 (1.06, 1.41), p=0.005 | 1.11 (1.00, 1.24), p=0.058 | 0.90 (0.82, 1.00), p=0.040 | 0.95 (0.90, 1.01), p=0.076 | 0.84 (0.79, 0.88), p<0.001 | 0.67 (0.65, 0.69), p<0.001 | 0.58 (0.55, 0.61), p<0.001 |

Effect of survey year within each gender

| Like school (OR 95%CI) | | | | | | | | |
| --- | --- | --- | --- | --- | --- | --- | --- | --- |
| **Predictor:** | ***2001***  ***survey*** | ***2003***  ***survey*** | ***2005***  ***survey*** | ***2013***  ***survey*** | ***2017***  ***survey*** | ***2019***  ***survey*** | ***2021***  ***survey*** | ***2023***  ***survey*** |
| **Reference category** | *2009 survey* | *2009 survey* | *2009 survey* | *2009 survey* | *2009 survey* | *2009 survey* | *2009 survey* | *2009 survey* |
| **Subgroup of students: Boys** | 0.78 (0.68, 0.89), p<0.001 | 0.75 (0.67, 0.84), p<0.001 | 0.64 (0.56, 0.73), p<0.001 | 0.96 (0.86, 1.07), p=0.472 | 0.50 (0.46, 0.55), p<0.001 | 0.51 (0.46, 0.56), p<0.001 | 0.53 (0.48, 0.58), p<0.001 | 0.39 (0.36, 0.43), p<0.001 |
| **Subgroup of students: Girls** | 0.70 (0.61, 0.81), p<0.001 | 0.76 (0.68, 0.86), p<0.001 | 0.71 (0.62, 0.80), p<0.001 | 0.78 (0.70, 0.87), p<0.001 | 0.43 (0.39, 0.47), p<0.001 | 0.38 (0.35, 0.42), p<0.001 | 0.32 (0.29, 0.35), p<0.001 | 0.21 (0.19, 0.23), p<0.001 |

*N.B. No confidence intervals added due to excessive computational time*

**1E. GENDER EFFECTS: SCHOOL BELONGING**

Effect of gender within each survey year

| **Subgroup of students:** | **2001 survey** | **2003 survey** | **2017 survey** | **2019 survey** | **2021 survey** | **2023 survey** |
| --- | --- | --- | --- | --- | --- | --- |
| **Predictor:** | *Girl* | *Girl* | *Girl* | *Girl* | *Girl* | *Girl* |
| **Reference category** | *Boy* | *Boy* | *Boy* | *Boy* | *Boy* | *Boy* |
| Belonging (OR 95%CI – just 1 interaction) | 0.94 (0.82, 1.09), p=0.432 | 1.01 (0.91, 1.12), p=0.809 | 0.82 (0.80, 0.85), p<0.001 | 0.71 (0.70, 0.73), p<0.001 | 0.55 (0.53, 0.57), p<0.001 | 0.51 (0.50, 0.53), p<0.001 |

Effect of survey year within each gender

| Belonging (OR 95%CI) | | | | | |
| --- | --- | --- | --- | --- | --- |
| **Predictor:** | ***2001 survey*** | ***2003 survey*** | ***2019***  ***survey*** | ***2021***  ***survey*** | ***2023***  ***survey*** |
| **Reference category** | *2017 survey* | *2017 survey* | *2017 survey* | *2017 survey* | *2017 survey* |
| **Subgroup of students: Boys (just one interaction)** | 1.05 (0.93, 1.18), p=0.414 | 0.94 (0.85, 1.03), p=0.193 | 1.12 (1.09, 1.15), p<0.001 | 1.11 (1.07, 1.15), p<0.001 | 0.89 (0.87, 0.92), p<0.001 |
| **Subgroup of students: Girls (just one interaction)** | 1.20 (1.07, 1.36), p=0.002 | 1.15 (1.05, 1.27), p=0.004 | 0.97 (0.94, 0.99), p=0.018 | 0.74 (0.71, 0.76), p<0.001 | 0.55 (0.54, 0.57), p<0.001 |

*N.B. No confidence intervals added due to excessive computational time* **1F. GENDER EFFECTS: ADULT CONFIDE**

Effect of gender within each survey year

| **Subgroup of students:** | **2017 survey** | **2019 survey** | **2021 survey** | **2023 survey** |
| --- | --- | --- | --- | --- |
| **Predictor:** | *Girl* | *Girl* | *Girl* | *Girl* |
| **Reference category** | *Boy* | *Boy* | *Boy* | *Boy* |
| Adult confide  (OR 95%CI) | 1.16 (1.13, 1.20), p<0.001 | 1.09 (1.06, 1.12), p<0.001 | 1.06 (1.02, 1.10), p=0.002 | 1.02 (0.99, 1.04), p=0.173 |

Effect of survey year within each gender

| Adult confide (OR 95%CI) | | | |
| --- | --- | --- | --- |
| **Predictor:** | ***2019 survey*** | ***2021 survey*** | ***2023 survey*** |
| **Reference category** | *2017 survey* | *2017 survey* | *2017 survey* |
| Subgroup of students: Boys | 1.14 (1.11, 1.17), p<0.001 | 0.93 (0.89, 0.96), p<0.001 | 0.94 (0.91, 0.96), p<0.001 |
| Subgroup of students: Girls | 1.07 (1.04, 1.10), p<0.001 | 0.85 (0.82, 0.88), p<0.001 | 0.82 (0.80, 0.84), p<0.001 |

*N.B. No confidence intervals added due to excessive computational time*

**2A. SCHOOL YEAR (AGE) EFFECTS: STAFF-STUDENT RELATIONSHIPS**

Effect of survey year within each grade

| Staff-student relationships (OR 95%CI) | | | | |
| --- | --- | --- | --- | --- |
| **Predictor:** | ***2017***  ***survey*** | ***2019***  ***survey*** | ***2021***  ***survey*** | ***2023***  ***survey*** |
| **Reference category** | *2013 survey* | *2013 survey* | *2013 survey* | *2013 survey* |
| **Subgroup of students: Year 7 – one interaction** | 1.18 (1.07, 1.31), p=0.001 | 1.34 (1.21, 1.48), p<0.001 | 0.93 (0.85, 1.02), p=0.132 | 0.80 (0.73, 0.87), p<0.001 |
| **Subgroup of students: Year 8 – one interaction** | 1.10 (1.00, 1.21), p=0.062 | 1.14 (1.03, 1.25), p=0.011 | 0.93 (0.85, 1.02), p=0.106 | 0.71 (0.65, 0.78), p<0.001 |
| **Subgroup of students: Year 9 – one interaction** | 0.96 (0.87, 1.06), p=0.434 | 1.02 (0.93, 1.13), p=0.674 | 0.89 (0.82, 0.98), p=0.015 | 0.70 (0.64, 0.76), p<0.001 |
| **Subgroup of students: Year 10 – one interaction** | 0.90 (0.81, 0.99), p=0.027 | 1.00 (0.91, 1.11), p=0.973 | 0.79 (0.73, 0.87), p<0.001 | 0.75 (0.69, 0.82), p<0.001 |
| **Subgroup of students: Year 11 – one interaction** | 0.85 (0.77, 0.95), p=0.003 | 1.01 (0.91, 1.12), p=0.875 | 0.79 (0.72, 0.88), p<0.001 | 0.86 (0.78, 0.95), p=0.002 |

*N.B ordinal outcome modelled as continuous for graph only to aid interpretation*

**2B. SCHOOL YEAR (AGE) EFFECTS (STUDENT RELATIONSHIPS)**

Effect of survey year within each grade

| Student relationships (OR 95%CI) | | | | | | | | |
| --- | --- | --- | --- | --- | --- | --- | --- | --- |
| **Predictor:** | ***2001***  ***survey*** | ***2003***  ***survey*** | ***2005***  ***survey*** | ***2013***  ***survey*** | ***2017***  ***survey*** | ***2019***  ***survey*** | ***2021***  ***survey*** | ***2023***  ***survey*** |
| **Reference category** | *2009*  *survey* | *2009*  *survey* | *2009*  *survey* | *2009*  *survey* | *2009*  *survey* | *2009*  *survey* | *2009*  *survey* | *2009*  *survey* |
| **Subgroup of students: Year 7** | 0.75 (0.66, 0.87), p<0.001 | 0.69 (0.60, 0.80), p<0.001 | 0.53 (0.46, 0.61), p<0.001 | 0.77 (0.68, 0.87), p<0.001 | 0.73 (0.65, 0.81), p<0.001 | 0.78 (0.70, 0.87), p<0.001 | 0.58 (0.52, 0.64), p<0.001 | 0.45 (0.41, 0.50), p<0.001 |
| **Subgroup of students: Year 8** | N/A | 0.84 (0.74, 0.96), p=0.009 | N/A | 0.71 (0.63, 0.80), p<0.001 | 0.53 (0.48, 0.59), p<0.001 | 0.56 (0.50, 0.62), p<0.001 | 0.45 (0.41, 0.50), p<0.001 | 0.34 (0.31, 0.37), p<0.001 |
| **Subgroup of students: Year 9** | 0.77 (0.68, 0.87), p<0.001 | 0.90 (0.80, 1.02), p=0.109 | 0.69 (0.61, 0.78), p<0.001 | 0.65 (0.57, 0.73), p<0.001 | 0.46 (0.42, 0.51), p<0.001 | 0.48 (0.43, 0.53), p<0.001 | 0.40 (0.36, 0.44), p<0.001 | 0.32 (0.29, 0.35), p<0.001 |
| **Subgroup of students: Year 10** | N/A | 0.84 (0.74, 0.96), p=0.009 | N/A | 0.63 (0.56, 0.72), p<0.001 | 0.44 (0.40, 0.49), p<0.001 | 0.45 (0.41, 0.50), p<0.001 | 0.39 (0.35, 0.43), p<0.001 | 0.31 (0.28, 0.34), p<0.001 |
| **Subgroup of students: Year 11** | 1.10 (0.96, 1.26), p=0.164 | 1.02 (0.89, 1.17), p=0.775 | 0.98 (0.86, 1.11), p=0.730 | 0.72 (0.63, 0.82), p<0.001 | 0.48 (0.43, 0.53), p<0.001 | 0.50 (0.45, 0.56), p<0.001 | 0.50 (0.45, 0.55), p<0.001 | 0.38 (0.34, 0.42), p<0.001 |

*N.B ordinal outcome modelled as continuous for graph only to aid interpretation*

**2C. SCHOOL YEAR (AGE) EFFECTS: STUDENT DECISION-MAKING**

Effect of survey year within each grade

| Student decision making (OR 95%CI) | | | | |
| --- | --- | --- | --- | --- |
| **Predictor:** | ***2017***  ***survey*** | ***2019***  ***survey*** | ***2021***  ***survey*** | ***2023***  ***survey*** |
| **Reference category** | *2013 survey* | *2013 survey* | *2013 survey* | *2013 survey* |
| **Subgroup of students: Year 7** | 1.33 (1.22, 1.45), p<0.001 | 1.33 (1.23, 1.45), p<0.001 | 1.11 (1.02, 1.21), p=0.015 | 0.93 (0.86, 1.01), p=0.105 |
| **Subgroup of students: Year 8** | 1.01 (0.93, 1.10), p=0.784 | 1.02 (0.94, 1.12), p=0.581 | 0.95 (0.88, 1.04), p=0.277 | 0.76 (0.70, 0.83), p<0.001 |
| **Subgroup of students: Year 9** | 0.82 (0.76, 0.90), p<0.001 | 0.83 (0.76, 0.90), p<0.001 | 0.82 (0.76, 0.89), p<0.001 | 0.70 (0.65, 0.77), p<0.001 |
| **Subgroup of students: Year 10** | 0.76 (0.70, 0.83), p<0.001 | 0.73 (0.67, 0.80), p<0.001 | 0.71 (0.65, 0.78), p<0.001 | 0.70 (0.64, 0.76), p<0.001 |
| **Subgroup of students: Year 11** | 0.68 (0.62, 0.75), p<0.001 | 0.65 (0.59, 0.71), p<0.001 | 0.62 (0.56, 0.68), p<0.001 | 0.72 (0.65, 0.79), p<0.001 |

*N.B ordinal outcome modelled as continuous for graph only to aid interpretation*

**2D. SCHOOL YEAR (AGE) EFFECTS: LIKE SCHOOL**

Effect of survey year within each grade

| Like school (OR 95%CI) | | | | | | | | |
| --- | --- | --- | --- | --- | --- | --- | --- | --- |
| **Predictor:** | ***2001***  ***survey*** | ***2003***  ***survey*** | ***2005***  ***survey*** | ***2013***  ***survey*** | ***2017***  ***survey*** | ***2019***  ***survey*** | ***2021***  ***survey*** | ***2023***  ***survey*** |
| **Reference category** | *2009*  *survey* | *2009*  *survey* | *2009*  *survey* | *2009*  *survey* | *2009*  *survey* | *2009*  *survey* | *2009*  *survey* | *2009*  *survey* |
| **Subgroup of students: Year 7** | 0.50 (0.39, 0.64), p<0.001 | 0.46 (0.36, 0.59), p<0.001 | 0.34 (0.27, 0.43), p<0.001 | 0.77 (0.60, 0.98), p=0.032 | 0.40 (0.33, 0.49), p<0.001 | 0.38 (0.31, 0.47), p<0.001 | 0.34 (0.28, 0.41), p<0.001 | 0.19 (0.16, 0.24), p<0.001 |
| **Subgroup of students: Year 8** | N/A | 0.89 (0.75, 1.06), p=0.188 | N/A | 1.06 (0.90, 1.25), p=0.479 | 0.55 (0.48, 0.64), p<0.001 | 0.51 (0.44, 0.58), p<0.001 | 0.47 (0.41, 0.53), p<0.001 | 0.29 (0.25, 0.33), p<0.001 |
| **Subgroup of students: Year 9** | 0.80 (0.68, 0.95), p=0.010 | 0.82 (0.69, 0.97), p=0.017 | 0.71 (0.60, 0.83), p<0.001 | 0.91 (0.77, 1.06), p=0.230 | 0.49 (0.43, 0.56), p<0.001 | 0.43 (0.38, 0.49), p<0.001 | 0.43 (0.38, 0.48), p<0.001 | 0.29 (0.25, 0.33), p<0.001 |
| **Subgroup of students: Year 10** | N/A | 0.73 (0.62, 0.87), p<0.001 | N/A | 0.75 (0.64, 0.88), p<0.001 | 0.42 (0.36, 0.48), p<0.001 | 0.41 (0.35, 0.47), p<0.001 | 0.38 (0.33, 0.43), p<0.001 | 0.27 (0.24, 0.31), p<0.001 |
| **Subgroup of students: Year 11** | 0.76 (0.65, 0.90), p=0.002 | 0.77 (0.65, 0.90), p=0.002 | 0.88 (0.75, 1.04), p=0.132 | 0.79 (0.68, 0.93), p=0.003 | 0.42 (0.37, 0.48), p<0.001 | 0.41 (0.36, 0.47), p<0.001 | 0.38 (0.34, 0.43), p<0.001 | 0.37 (0.32, 0.42), p<0.001 |

*N.B. No confidence intervals added due to excessive computational time*

**2E. SCHOOL YEAR (AGE) EFFECTS: BELONGING**

Effect of survey year within each grade

| Belonging (OR 95%CI) | | | | | |
| --- | --- | --- | --- | --- | --- |
| **Predictor:** | ***2001***  ***survey*** | ***2003***  ***survey*** | ***2019***  ***survey*** | ***2021***  ***survey*** | ***2023***  ***survey*** |
| **Reference category** | *2017 survey* | *2017 survey* | *2017 survey* | *2017 survey* | *2017 survey* |
| **Subgroup of students: Year 7** | 0.72 (0.62, 0.83), p<0.001 | 0.62 (0.54, 0.71), p<0.001 | 1.00 (0.95, 1.04), p=0.863 | 0.79 (0.74, 0.83), p<0.001 | 0.62 (0.59, 0.65), p<0.001 |
| **Subgroup of students: Year 8** | N/A | 1.05 (0.91, 1.19), p=0.514 | 1.07 (1.02, 1.11), p=0.002 | 0.92 (0.88, 0.97), p=0.002 | 0.66 (0.63, 0.68), p<0.001 |
| **Subgroup of students: Year 9** | 1.18 (1.03, 1.34), p=0.016 | 1.08 (0.95, 1.23), p=0.223 | 1.05 (1.01, 1.10), p=0.011 | 0.96 (0.91, 1.01), p=0.087 | 0.67 (0.65, 0.70), p<0.001 |
| **Subgroup of students: Year 10** | N/A | 1.12 (0.98, 1.27), p=0.098 | 1.01 (0.96, 1.05), p=0.782 | 0.92 (0.87, 0.97), p=0.001 | 0.73 (0.70, 0.76), p<0.001 |
| **Subgroup of students: Year 11** | 1.51 (1.32, 1.74), p<0.001 | 1.42 (1.24, 1.63), p<0.001 | 1.05 (1.00, 1.10), p=0.034 | 0.88 (0.83, 0.93), p<0.001 | 0.83 (0.80, 0.87), p<0.001 |

*N.B. No confidence intervals added due to excessive computational time*

**2F. SCHOOL YEAR (AGE) EFFECTS: ADULT CONFIDE**

Effect of survey year within each grade

| Adult confide (OR 95%CI) | | | |
| --- | --- | --- | --- |
| **Predictor:** | ***2019***  ***survey*** | ***2021***  ***survey*** | ***2023***  ***survey*** |
| **Reference category** | *2017 survey* | *2017 survey* | *2017 survey* |
| **Subgroup of students: Year 7** | 1.10 (1.04, 1.15), p<0.001 | 0.73 (0.69, 0.78), p<0.001 | 0.77 (0.74, 0.81), p<0.001 |
| **Subgroup of students: Year 8** | 1.14 (1.09, 1.19), p<0.001 | 0.87 (0.83, 0.92), p<0.001 | 0.85 (0.82, 0.89), p<0.001 |
| **Subgroup of students: Year 9** | 1.11 (1.07, 1.16), p<0.001 | 0.91 (0.87, 0.96), p<0.001 | 0.85 (0.81, 0.88), p<0.001 |
| **Subgroup of students: Year 10** | 1.08 (1.04, 1.13), p<0.001 | 0.92 (0.87, 0.97), p=0.001 | 0.92 (0.88, 0.96), p<0.001 |
| **Subgroup of students: Year 11** | 1.08 (1.03, 1.13), p=0.001 | 0.98 (0.93, 1.04), p=0.489 | 0.99 (0.94, 1.03), p=0.525 |

*N.B. No confidence intervals added due to excessive computational time*

**3A. FAMILY AFFLUENCE EFFECTS (STAFF-STUDENT RELATIONSHIPS)**

Effect of survey year within each family affluence category

| Staff-student relationships (OR 95%CI) | | | | |
| --- | --- | --- | --- | --- |
| **Predictor:** | ***2017***  ***survey*** | ***2019***  ***survey*** | ***2021 survey*** | ***2023 survey*** |
| **Reference category** | *2013 survey* | *2013 survey* | *2013 survey* | *2013 survey* |
| Subgroup of students: Low FAS | 0.99 (0.92, 1.07), p=0.849 | 1.04 (0.96, 1.12), p=0.329 | 0.86 (0.80, 0.93), p<0.001 | 0.71 (0.67, 0.76), p<0.001 |
| Subgroup of students: Medium FAS | 1.08 (0.99, 1.16), p=0.068 | 1.19 (1.09, 1.29), p<0.001 | 0.93 (0.86, 1.00), p=0.049 | 0.82 (0.76, 0.88), p<0.001 |
| Subgroup of students: High FAS | 0.93 (0.86, 1.01), p=0.080 | 1.08 (1.00, 1.18), p=0.054 | 0.83 (0.77, 0.90), p<0.001 | 0.76 (0.70, 0.81), p<0.001 |

| Staff-student relationships (OR 95%CI) | |  |  |  |  |
| --- | --- | --- | --- | --- | --- |
| **Subgroup of students:** | **2013 survey** | **2017 survey** | **2019 survey** | **2021 survey** | **2023 survey** |
| **Predictor:** | *Medium* | *Medium* | *Medium* | *Medium* | *Medium* |
| **Reference category** | *Low* | *Low* | *Low* | *Low* | *Low* |
|  | 0.96 (0.88, 1.05) p=0.342 | 1.04 (0.98, 1.10) p=0.176 | 1.09 (1.03, 1.16) p=0.002 | 1.03 (0.99, 1.07) p=0.099 | 1.11 (1.08, 1.14) p<0.001 |
|  |  |  |  |  |  |
| **Predictor:** | *High* | *High* | *High* | *High* | *High* |
| **Reference category** | *Low* | *Low* | *Low* | *Low* | *Low* |
|  | 1.09 (0.99, 1.19) p=0.067 | 1.02 (0.97, 1.08) p=0.438 | 1.14 (1.08, 1.20) p<0.001 | 1.05 (1.01, 1.09) p=0.017 | 1.16 (1.13, 1.19) p<0.001 |

*N.B ordinal outcome modelled as continuous for graph only to aid interpretation*

**3B. FAMILY AFFLUENCE EFFECTS (STUDENT RELATIONSHIPS)**

Effect of survey year within each family affluence category

| Student relationships (OR 95%CI) | | | | | | | | |
| --- | --- | --- | --- | --- | --- | --- | --- | --- |
| **Predictor:** | ***2001 survey*** | ***2003***  ***survey*** | ***2005***  ***survey*** | ***2013***  ***survey*** | ***2017***  ***survey*** | ***2019***  ***survey*** | ***2021 survey*** | ***2023 survey*** |
| **Reference category** | *2009*  *survey* | *2009*  *survey* | *2009*  *survey* | *2009*  *survey* | *2009*  *survey* | *2009*  *survey* | *2009*  *survey* | *2009*  *survey* |
| Subgroup of students: Low FAS | 0.93 (0.82, 1.05), p=0.218 | 0.91 (0.82, 1.02), p=0.104 | 0.69 (0.61, 0.78), p<0.001 | 0.72 (0.66, 0.80), p<0.001 | 0.50 (0.46, 0.54), p<0.001 | 0.52 (0.48, 0.57), p<0.001 | 0.48 (0.44, 0.51), p<0.001 | 0.34 (0.32, 0.37), p<0.001 |
| Subgroup of students: Medium FAS | 0.80 (0.72, 0.90), p<0.001 | 0.81 (0.73, 0.88), p<0.001 | 0.71 (0.64, 0.79), p<0.001 | 0.66 (0.60, 0.73), p<0.001 | 0.53 (0.49, 0.58), p<0.001 | 0.54 (0.50, 0.59), p<0.001 | 0.45 (0.42, 0.48), p<0.001 | 0.35 (0.33, 0.38), p<0.001 |
| Subgroup of students: High FAS | 0.73 (0.63, 0.83), p<0.001 | 0.90 (0.80, 1.02), p=0.091 | 0.63 (0.56, 0.72), p<0.001 | 0.69 (0.62, 0.77), p<0.001 | 0.53 (0.48, 0.59), p<0.001 | 0.57 (0.52, 0.63), p<0.001 | 0.45 (0.41, 0.50), p<0.001 | 0.37 (0.34, 0.41), p<0.001 |

| Student relationships (OR 95%CI) | | | | | | | | | |
| --- | --- | --- | --- | --- | --- | --- | --- | --- | --- |
| **Subgroup of students:** | ***2001 survey*** | ***2003***  ***survey*** | ***2005***  ***survey*** | **2009**  **survey** | ***2013***  ***survey*** | ***2017***  ***survey*** | ***2019***  ***survey*** | ***2021 survey*** | ***2023 survey*** |
| **Predictor:** | *Medium* | *Medium* | *Medium* | *Medium* | *Medium* | *Medium* | *Medium* | *Medium* | *Medium* |
| **Reference category** | *Low* | *Low* | *Low* | *Low* | *Low* | *Low* | *Low* | *Low* | *Low* |
|  | 1.05 (0.92, 1.20) p=0.458 | 1.07 (0.96, 1.18) p=0.231 | 1.25 (1.09, 1.43) p=0.001 | 1.21 (1.11, 1.32) p<0.001 | 1.10 (1.01, 1.21) p=0.029 | 1.30 (1.23, 1.37) p<0.001 | 1.26 (1.20, 1.34) p<0.001 | 1.14 (1.10, 1.19) p<0.001 | 1.25 (1.21, 1.28) p<0.001 |
|  |  |  |  |  |  |  |  |  |  |
| **Predictor:** | *High* | *High* | *High* | *High* | *High* | *High* | *High* | *High* | *High* |
| **Reference category** | *Low* | *Low* | *Low* | *Low* | *Low* | *Low* | *Low* | *Low* | *Low* |
|  | 1.05 (0.90, 1.22) p=0.524 | 1.32 (1.18, 1.48) p<0.001 | 1.23 (1.07, 1.41) p=0.004 | 1.34 (1.21, 1.49) p<0.001 | 1.28 (1.17, 1.40) p<0.001 | 1.44 (1.36, 1.52) p<0.001 | 1.48 (1.40, 1.56) p<0.001 | 1.28 (1.23, 1.33) p<0.001 | 1.46 (1.42, 1.49) p<0.001 |

*N.B ordinal outcome modelled as continuous for graph only to aid interpretation*

**3C. FAMILY AFFLUENCE EFFECTS (STUDENT DECISION-MAKING)**

Effect of survey years by family affluence tertile

| Student decision-making (OR 95%CI) | | | | |
| --- | --- | --- | --- | --- |
| **Predictor:** | ***2017***  ***survey*** | ***2019***  ***survey*** | ***2021 survey*** | ***2023 survey*** |
| **Reference category** | *2013 survey* | *2013 survey* | *2013 survey* | *2013 survey* |
| Subgroup of students: Low FAS | 0.96 (0.90, 1.02), p=0.207 | 0.94 (0.88, 1.00), p=0.048 | 0.89 (0.84, 0.96), p=0.001 | 0.78 (0.73, 0.83), p<0.001 |
| Subgroup of students: Medium FAS | 0.92 (0.86, 0.99), p=0.026 | 0.90 (0.84, 0.96), p=0.002 | 0.84 (0.78, 0.90), p<0.001 | 0.76 (0.71, 0.81), p<0.001 |
| Subgroup of students: High FAS | 0.83 (0.77, 0.89), p<0.001 | 0.84 (0.78, 0.90), p<0.001 | 0.77 (0.72, 0.83), p<0.001 | 0.74 (0.69, 0.79), p<0.001 |

| Student decision-making (OR 95%CI) | |  |  |  |  |
| --- | --- | --- | --- | --- | --- |
| **Subgroup of students:** | **2013 survey** | **2017 survey** | **2019 survey** | **2021 survey** | **2023 survey** |
| **Predictor:** | *Medium* | *Medium* | *Medium* | *Medium* | *Medium* |
| **Reference category** | *Low* | *Low* | *Low* | *Low* | *Low* |
|  | 1.06 (0.97, 1.16) p=0.190 | 1.02 (0.99, 1.05) p=0.133 | 1.02 (0.99, 1.04) p=0.245 | 0.99 (0.97, 1.02) p=0.646 | 1.04 (1.01, 1.06) p=0.008 |
|  |  |  |  |  |  |
| **Predictor:** | *High* | *High* | *High* | *High* | *High* |
| **Reference category** | *Low* | *Low* | *Low* | *Low* | *Low* |
|  | 1.12 (1.03, 1.23) p=0.012 | 0.97 (0.94, 1.00) p=0.024 | 1.01 (0.98, 1.04) p=0.545 | 0.97 (0.94, 1.00) p=0.034 | 1.07 (1.04, 1.10) p<0.001 |

*N.B ordinal outcome modelled as continuous for graph only to aid interpretation*

**3D. FAMILY AFFLUENCE EFFECTS (LIKE SCHOOL)**

Effect of survey years by family affluence tertile

| Like school (OR 95%CI) | | | | | | | | |
| --- | --- | --- | --- | --- | --- | --- | --- | --- |
| **Predictor:** | ***2001***  ***survey*** | ***2003***  ***survey*** | ***2005***  ***survey*** | ***2013***  ***survey*** | ***2017***  ***survey*** | ***2019***  ***survey*** | ***2021***  ***survey*** | ***2023***  ***survey*** |
| **Reference category** | *2009*  *survey* | *2009*  *survey* | *2009*  *survey* | *2009*  *survey* | *2009*  *survey* | *2009*  *survey* | *2009*  *survey* | *2009*  *survey* |
| Subgroup of students: Low FAS | 0.76 (0.65, 0.90), p=0.001 | 0.69 (0.60, 0.80), p<0.001 | 0.62 (0.53, 0.73), p<0.001 | 0.92 (0.81, 1.04), p=0.197 | 0.48 (0.43, 0.53), p<0.001 | 0.43 (0.38, 0.47), p<0.001 | 0.40 (0.36, 0.44), p<0.001 | 0.28 (0.25, 0.31), p<0.001 |
| Subgroup of students: Medium FAS | 0.76 (0.66, 0.88), p<0.001 | 0.77 (0.68, 0.88), p<0.001 | 0.71 (0.61, 0.81), p<0.001 | 0.81 (0.72, 0.92), p=0.001 | 0.47 (0.42, 0.52), p<0.001 | 0.44 (0.40, 0.49), p<0.001 | 0.40 (0.37, 0.44), p<0.001 | 0.27 (0.25, 0.30), p<0.001 |
| Subgroup of students: High FAS | 0.66 (0.54, 0.80), p<0.001 | 0.80 (0.67, 0.94), p=0.006 | 0.68 (0.57, 0.81), p<0.001 | 0.83 (0.71, 0.98), p=0.024 | 0.45 (0.39, 0.51), p<0.001 | 0.43 (0.38, 0.50), p<0.001 | 0.41 (0.36, 0.47), p<0.001 | 0.29 (0.26, 0.34), p<0.001 |

| Like school (OR 95%CI) | | | | | | | | | |
| --- | --- | --- | --- | --- | --- | --- | --- | --- | --- |
| **Subgroup of students:** | ***2001 survey*** | ***2003***  ***survey*** | ***2005***  ***survey*** | **2009**  **survey** | ***2013***  ***survey*** | ***2017***  ***survey*** | ***2019***  ***survey*** | ***2021 survey*** | ***2023 survey*** |
| **Predictor:** | *Medium* | *Medium* | *Medium* | *Medium* | *Medium* | *Medium* | *Medium* | *Medium* | *Medium* |
| **Reference category** | *Low* | *Low* | *Low* | *Low* | *Low* | *Low* | *Low* | *Low* | *Low* |
|  | 1.15 (0.97, 1.37) p=0.116 | 1.29 (1.13, 1.47) p<0.001 | 1.31 (1.11, 1.55) p=0.002 | 1.16 (1.02, 1.30) p=0.019 | 1.02 (0.91, 1.15) p=0.743 | 1.13 (1.06, 1.21) p<0.001 | 1.20 (1.12, 1.28) p<0.001 | 1.15 (1.11, 1.20) p<0.001 | 1.12 (1.05, 1.19) p<0.001 |
|  |  |  |  |  |  |  |  |  |  |
| **Predictor:** | *High* | *High* | *High* | *High* | *High* | *High* | *High* | *High* | *High* |
| **Reference category** | *Low* | *Low* | *Low* | *Low* | *Low* | *Low* | *Low* | *Low* | *Low* |
|  | 1.12 (0.92, 1.38) p=0.253 | 1.49 (1.28, 1.73) p<0.001 | 1.41 (1.18, 1.69) p<0.001 | 1.30 (1.12, 1.51) p=0.001 | 1.18 (1.04, 1.33) p=0.010 | 1.21 (1.13, 1.29) p<0.001 | 1.32 (1.24, 1.41) p<0.001 | 1.33 (1.28, 1.39) p<0.001 | 1.35 (1.27, 1.44) p<0.001 |

*N.B. No confidence intervals added due to excessive computational time*

**3E. FAMILY AFFLUENCE EFFECTS (SCHOOL BELONGING)**

Effect of survey years by family affluence

| Belonging (OR 95%CI) | | | | | |
| --- | --- | --- | --- | --- | --- |
| **Predictor:** | **2001 survey** | **2003 survey** | ***2019***  ***survey*** | ***2021 survey*** | ***2023 survey*** |
| **Reference category** | *2017 survey* | *2017 survey* | *2017 survey* | *2017 survey* | *2017 survey* |
| Subgroup of students: Low FAS | 1.12 (0.98, 1.29), p=0.103 | 1.07 (0.95, 1.21), p=0.250 | 1.00 (0.97, 1.04), p=0.863 | 0.90 (0.86, 0.93), p<0.001 | 0.65 (0.63, 0.67), p<0.001 |
| Subgroup of students: Medium FAS | 1.15 (1.01, 1.30), p=0.033 | 1.00 (0.90, 1.11), p=0.971 | 1.02 (0.98, 1.05), p=0.394 | 0.86 (0.83, 0.89), p<0.001 | 0.69 (0.66, 0.71), p<0.001 |
| Subgroup of students: High FAS | 1.04 (0.89, 1.22), p=0.594 | 1.08 (0.96, 1.21), p=0.200 | 1.09 (1.06, 1.13), p<0.001 | 0.95 (0.91, 0.99), p=0.010 | 0.76 (0.73, 0.78), p<0.001 |

| Belonging (OR 95%CI) | | | | | | |
| --- | --- | --- | --- | --- | --- | --- |
| **Subgroup of students:** | ***2001***  ***survey*** | ***2003***  ***survey*** | ***2017***  ***survey*** | ***2019***  ***survey*** | ***2021***  ***survey*** | ***2023***  ***survey*** |
| **Predictor:** | *Medium* | *Medium* | *Medium* | *Medium* | *Medium* | *Medium* |
| **Reference category** | *Low* | *Low* | *Low* | *Low* | *Low* | *Low* |
|  | 1.24 (1.05, 1.46) p=0.012 | 1.13 (1.00, 1.28) p=0.059 | 1.21 (1.17, 1.25) p<0.001 | 1.22 (1.18, 1.26) p<0.001 | 1.16 (1.11, 1.21) p<0.001 | 1.27 (1.24, 1.31) p<0.001 |
|  |  |  |  |  |  |  |
| **Predictor:** | *High* | *High* | *High* | *High* | *High* | *High* |
| **Reference category** | *Low* | *Low* | *Low* | *Low* | *Low* | *Low* |
|  | 1.19 (0.99, 1.44) p=0.070 | 1.29 (1.12, 1.48) p<0.001 | 1.28 (1.24, 1.33) p<0.001 | 1.40 (1.35, 1.44) p<0.001 | 1.36 (1.29, 1.42) p<0.001 | 1.49 (1.44, 1.53) p<0.001 |

*N.B. No confidence intervals added due to excessive computational time*

**3F. FAMILY AFFLUENCE EFFECTS (ADULT CONFIDE)**

Effect of survey years by family affluence tertile

| Adult confide (OR 95%CI) | | | |
| --- | --- | --- | --- |
| **Predictor:** | ***2019***  ***survey*** | ***2021 survey*** | ***2023 survey*** |
| **Reference category** | *2017 survey* | *2017 survey* | *2017 survey* |
| Subgroup of students: Low FAS | 1.11 (1.07, 1.15), p<0.001 | 0.89 (0.85, 0.93), p<0.001 | 0.85 (0.83, 0.88), p<0.001 |
| Subgroup of students: Medium FAS | 1.07 (1.03, 1.11), p<0.001 | 0.87 (0.83, 0.90), p<0.001 | 0.86 (0.83, 0.89), p<0.001 |
| Subgroup of students: High FAS | 1.12 (1.09, 1.16), p<0.001 | 0.90 (0.86, 0.94), p<0.001 | 0.92 (0.89, 0.95), p<0.001 |

| Adult confide (OR 95%CI) | | | | |
| --- | --- | --- | --- | --- |
| **Subgroup of students:** | **2017 survey** | **2019 survey** | **2021 survey** | **2023 survey** |
| **Predictor:** | *Medium* | *Medium* | *Medium* | *Medium* |
| **Reference category** | *Low* | *Low* | *Low* | *Low* |
|  | 1.12 (1.08, 1.16) p<0.001 | 1.08 (1.04, 1.11) p<0.001 | 1.09 (1.04, 1.14) p<0.001 | 1.12 (1.09, 1.16) p<0.001 |
|  |  |  |  |  |
| **Predictor:** | *High* | *High* | *High* | *High* |
| **Reference category** | *Low* | *Low* | *Low* | *Low* |
|  | 1.11 (1.08, 1.15) p<0.001 | 1.13 (1.09, 1.17) p<0.001 | 1.13 (1.08, 1.19) p<0.001 | 1.20 (1.16, 1.23) p<0.001 |

*N.B. No confidence intervals added due to excessive computational time*
